# Supplementary material
Source: PubMed Central journal article supplement (PMC3077042)
Supplement: NIHMS282394-supplement-1_si_001.pdf [file NIHMS282394-supplement-1_si_001.pdf]

# Sequential Aldol Condensation – Transition Metal-Catalyzed Addition Reactions of Aldehydes, Methyl Ketones and Arylboronic Acids

Yuan-Xi Liao, Chun-Hui Xing, Matthew Israel and Qiao-Sheng Hu\*

Department of Chemistry, College of Staten Island and the Graduate Center of the City University of New York, 2800 Victory Boulevard, Staten Island, New York 10314

## Supporting Information

**General:** NMR spectra were recorded on Varian 300MHz or 600MHz spectrometers. Elemental analysis was carried out by Altantic Microanalysis, Inc., Norcross, GA. High resolution mass spectra(HRMS) were acquired by Agilent G6520 Q-TOF mass spectrometer. All yields reported refer to isolated yields unless otherwise indicated, and the product purity was estimated to be greater than 95% as determined by  $^1\text{H}$  NMR. Compounds described in the literature were characterized by comparison of their  $^1\text{H}$  NMR and  $^{13}\text{C}$  NMR spectra to reported data. New compounds were also characterized by element analysis or high resolution mass.

Arylboronic acids were obtained as gifts from Frontier Scientific, Inc. Palladacycle **1** was prepared according to the reported method.<sup>1</sup> Other chemical reagents were purchased from Strem Chemicals, Aldrich or Alpha Aesar and used directly.

**General procedure for sequential aldol condensation-transition metal-catalyzed addition reactions of aldehydes, methyl ketones and arylboronic acids:** In a glove-box, to a vial containing aldehyde (0.25 mmol) and  $\text{K}_2\text{CO}_3$  (0.75 mmol) were added ketone (0.2 mL), methanol (0.1 mL) and water (0.1 mL). After the mixture was stirred at 50 - 60 °C for 30 min, arylboronic acid (0.5 mmol), THF (1 mL) and  $[\text{Rh}(\text{COD})\text{Cl}]_2$  or palladacycle **1** (0.0025 mmol) (An Ohaus Explorer analytic balance with 0.1 mg accuracy was used for weighing the catalysts) were added into reaction mixture and then stirred at room temperature for another 6 hours. The reaction was quenched by adding 4 N HCl (2 mL) aqueous solution. The mixture was extracted with  $\text{CH}_2\text{Cl}_2$  (3 x15 mL). The organic layers were combined. After evaporation of the organic solvents, the residue was subjected to column chromatography [silica gel, ethyl acetate/hexane (v/v=1:20) as eluent] to afford the products.

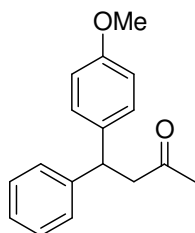

### 4-(4-Methoxyphenyl)-4-phenylbutan-2-one (**2a**)<sup>2</sup>

84% yield (53 mg).  $^1\text{H}$  NMR ( $\text{CDCl}_3$ , 600 MHz):  $\delta$  7.26 (t,  $J=7.2$  Hz, 4H), 7.21-7.19 (m, 2H), 7.17-7.12 (m, 3H), 6.82-6.79(m, 2H), 4.53 (t,  $J=7.2$  Hz, 1H), 3.70 (s, 3H), 3.14 (d,  $J=7.8$  Hz, 1H), 2.06 (3H, s) ppm.  $^{13}\text{C}$  NMR ( $\text{CDCl}_3$ , 150 MHz):  $\delta$  207.0, 158.0, 144.2, 135.9, 128.6, 128.5, 127.5, 126.3, 113.9, 55.2, 49.8, 45.2, 30.6 ppm.

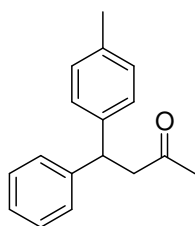

**4-Phenyl-4-p-tolylbutan-2-one (2b)**<sup>2</sup>

81% yield (475 mg). <sup>1</sup>H NMR (CDCl<sub>3</sub>, 600 MHz): δ 7.27-7.24 (m, 2H), 7.21-7.20 (m, 2H), 7.17-7.14 (m, 1H), 7.11-7.06 (m, 4H), 4.57 (t, *J*=7.2 Hz, 1H), 3.13 (d, *J*=7.2 Hz, 2H), 2.28 (s, 3H), 2.06 (s, 3H) ppm. <sup>13</sup>C NMR (CDCl<sub>3</sub>, 150 MHz): δ 206.9, 144.0, 140.7, 135.9, 129.2, 128.5, 127.6, 127.5, 126.3, 49.7, 45.6, 30.6, 20.9 ppm.

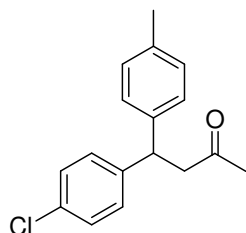

**4-(4-Chlorophenyl)-4-p-tolylbutan-2-one (2c)**

88% yield (60 mg). White solid, m.p. 70-71°C. <sup>1</sup>H NMR (CDCl<sub>3</sub>, 600 MHz): δ 7.24 (d, *J*=8.4 Hz, 2H), 7.15 (d, *J*=8.4 Hz, 2H), 7.08 (m, 4H), 4.53 (t, *J*=7.2 Hz, 1H), 3.14 (d, *J*=7.2 Hz, 2H), 2.30 (s, 3H), 2.09 (s, 3H) ppm. <sup>13</sup>C NMR (CDCl<sub>3</sub>, 150 MHz): 206.5, 142.6, 140.3, 136.2, 132.1, 129.4, 129.0, 128.7, 127.4, 126.3, 49.7, 45.6, 30.6, 20.9 ppm. IR (neat) ν 3030(w), 3001(w), 2920(m), 1704(s), 1490(s), 1349(s), 762(s) cm<sup>-1</sup>. HR-MS (ESI): calcd. for C<sub>17</sub>H<sub>18</sub>ClO [M+H]<sup>+</sup> 273.1041, found 273.1043.

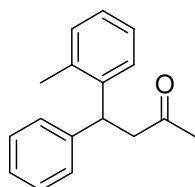

**4-Phenyl-4-o-tolylbutan-2-one (2d)**<sup>2</sup>

85% yield (51 mg). <sup>1</sup>H NMR (CDCl<sub>3</sub>, 600 MHz): δ 7.25-7.22 (m, 4H), 7.17-7.12 (m, 5H), 4.78 (t, *J*=7.2 Hz, 1H), 3.14 (d, *J*=7.2 Hz, 2H), 2.29 (s, 3H), 2.06 (s, 3H) ppm. <sup>13</sup>C NMR (CDCl<sub>3</sub>, 150 MHz): δ 206.8, 143.5, 141.5, 136.3, 130.8, 128.4, 127.9, 126.40, 126.2 (2C), 126.0, 50.0, 41.9, 30.6, 19.8 ppm.

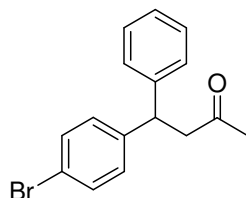

**4-(4-Bromophenyl)-4-phenylbutan-2-one (2e)**

86% yield (65 mg). Light yellow oil. <sup>1</sup>H NMR (CDCl<sub>3</sub>, 600 MHz): δ 7.38 (d, *J*=7.8 Hz, 2H), 7.27 (t, *J*=7.8 Hz, 2H), 7.18-7.17 (m, 3H), 7.09 (d, *J*=8.4 Hz, 2H), 4.55 (t, *J*=7.2 Hz, 1H), 3.15 (d, *J*=7.2 Hz, 1H), 2.07 (3H, s) ppm. <sup>13</sup>C NMR (CDCl<sub>3</sub>, 150 MHz): δ 206.3, 143.2, 142.9, 131.6, 129.4, 128.6, 127.5, 126.6, 120.2, 49.3, 45.3, 30.6 ppm. IR (neat): 3060(w), 3027(w), 2969(w), 2897(w), 1717(s), 1487(s), 699(s) cm<sup>-1</sup>. HR-MS (ESI): calcd. for C<sub>16</sub>H<sub>19</sub>BrNO [M+NH<sub>4</sub>]<sup>+</sup> 322.0626, found 322.0626.

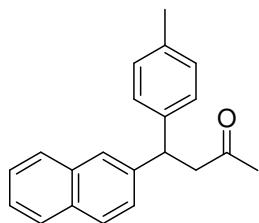

**4-(Naphthalen-2-yl)-4-p-tolylbutan-2-one (2f)**

84% yield (60 mg). Pale yellow solid, m. p.: 79-80 °C.  $^1\text{H}$  NMR ( $\text{CDCl}_3$ , 600 MHz):  $\delta$  7.77 (t,  $J=7.8$  Hz, 2H), 7.73 (d,  $J=8.4$  Hz, 1H), 7.67 (m, 4H), 7.45-7.40 (m, 2H), 7.31 (d,  $J=8.4$  Hz, 1H), 7.15-7.03 (m, 4H), 4.71 (t,  $J=7.2$  Hz, 1H), 3.25 (t,  $J=7.8$  Hz, 2H), 2.28 (s, 3H), 2.09 (s, 3H) ppm.  $^{13}\text{C}$  NMR ( $\text{CDCl}_3$ , 150 MHz):  $\delta$  206.9, 141.5, 140.7, 136.0, 133.4, 132.2, 129.3, 128.3, 127.7 (2C), 127.5, 126.5, 126.0, 125.6, 125.5, 49.6, 45.7, 30.7, 20.9 ppm. IR (neat) 3025(w), 2968(m), 1710(s)  $\text{cm}^{-1}$ . HR-MS (ESI): calcd. for  $\text{C}_{21}\text{H}_{24}\text{NO}$   $[\text{M}+\text{NH}_4]^+$  306.1852, found 306.1854.

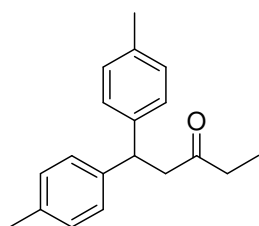

**1,1-Dip-tolylpentan-3-one (2g)**

86% yield (57 mg). White solid, m. p.: 83-84 °C.  $^1\text{H}$  NMR ( $\text{CDCl}_3$ , 600 MHz):  $\delta$  7.10-7.05 (m, 8H), 4.53 (t,  $J=7.8$  Hz, 1H), 3.76 (s, 3H), 3.11 (d,  $J=7.2$  Hz, 2H), 2.32 (q,  $J=7.2$  Hz, 2H), 2.78 (s, 6H), 0.96 (t,  $J=7.2$  Hz, 3H) ppm.  $^{13}\text{C}$  NMR ( $\text{CDCl}_3$ , 150 MHz):  $\delta$  209.7, 141.2, 135.8, 129.2, 127.5, 48.6, 45.3, 36.7, 20.9, 7.5 ppm. IR (neat) 2980(m), 2923(m), 1712(s), 1512(m), 1373(m), 1108(s), 805(s)  $\text{cm}^{-1}$ . Anal. Calcd for  $\text{C}_{19}\text{H}_{22}\text{O}$ : C, 85.67; H, 8.32; Found: C, 85.51; H, 8.34.

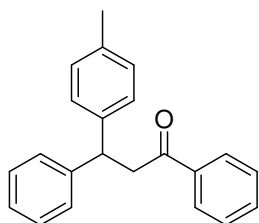

**1,3-Diphenyl-3-p-tolylpropan-1-one (2h) <sup>3</sup>**

74% yield (56 mg).  $^1\text{H}$  NMR ( $\text{CDCl}_3$ , 600 MHz):  $\delta$  7.93 (d,  $J=8.4$  Hz, 2H), 7.54 (t,  $J=8.4$  Hz, 2H), 7.43 (t,  $J=7.2$  Hz, 4H), 7.26-7.25 (m, 4H), 7.17-7.15 (m, 3H), 7.07 (d,  $J=8.4$  Hz, 2H), 4.79 (t,  $J=7.2$  Hz, 1H), 3.72 (d,  $J=7.2$  Hz, 2H), 2.28 (s, 3H) ppm.  $^{13}\text{C}$  NMR ( $\text{CDCl}_3$ , 150 MHz):  $\delta$  198.7, 144.4, 141.1, 137.1, 135.9, 133.0, 129.2, 128.6, 128.5, 128.0, 127.8, 127.6, 126.3, 45.5, 44.8, 21.0 ppm.

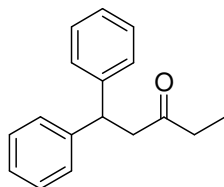

**1,1-Diphenylpentan-3-one (2i)**

86% yield (57 mg). White solid, m.p.: 26-27 °C.  $^1\text{H}$  NMR ( $\text{CDCl}_3$ , 600 MHz):  $\delta$  7.27-7.25 (m, 4H), 7.22-7.21 (m, 4H), 7.18-7.15 (m, 2H), 4.61 (t,  $J=7.2$  Hz, 1H), 3.14 (d,  $J=7.2$  Hz, 2H), 2.32 (q,  $J=7.2$  Hz, 2H), 0.94 (t,  $J=7.2$  Hz, 3H) ppm.  $^{13}\text{C}$  NMR ( $\text{CDCl}_3$ , 150 MHz):  $\delta$  209.5, 143.9, 128.5, 127.7, 126.4, 48.4, 46.0,

36.7, 7.5 ppm. IR (neat) 3028(w), 2940(w), 1710(m), 1494(m), 1452(m), 697(s)  $\text{cm}^{-1}$ . HR-MS (ESI): calcd. for  $\text{C}_{17}\text{H}_{22}\text{NO}$   $[\text{M}+\text{NH}_4]^+$  256.1696, found 256.1697.

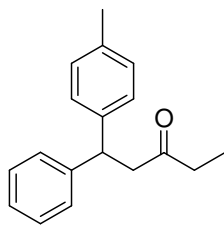

**1-Phenyl-1-p-tolylpentan-3-one (2j)**

85% yield (54 mg). White solid, m. p.: 28-29 °C.  $^1\text{H}$  NMR ( $\text{CDCl}_3$ , 600 MHz):  $\delta$  7.27-7.24 (m, 2H), 7.20-7.19 (m, 2H), 7.17-7.14 (m, 1H), 7.11-7.07 (m, 4H), 4.54 (t,  $J=7.2$  Hz, 1H), 3.15 (d,  $J=7.2$  Hz, 2H), 2.33 (q,  $J=7.2$  Hz, 2H), 2.28 (s, 3H), 0.95 (t,  $J=7.2$  Hz, 3H) ppm.  $^{13}\text{C}$  NMR ( $\text{CDCl}_3$ , 150 MHz):  $\delta$  209.6, 144.2, 141.0, 129.2, 128.5, 127.7, 127.6, 126.3, 48.6, 45.7, 36.7, 21.0, 7.6 ppm. IR (neat) 3025(w), 2921(m), 1711(s), 1514(m), 1454(m), 773(m), 726(s), 699(s)  $\text{cm}^{-1}$ . HR-MS (ESI): calcd. for  $\text{C}_{18}\text{H}_{20}\text{NaO}$   $[\text{M}+\text{Na}]^+$  275.1406, found 275.1409.

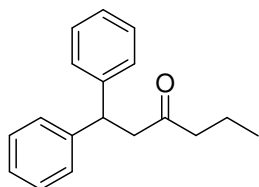

**1,1-Diphenylhexan-3-one (2k)**

81% yield (51 mg). Light yellow oil.  $^1\text{H}$  NMR ( $\text{CDCl}_3$ , 600 MHz):  $\delta$  7.27-7.14 (m, 10H), 4.61 (t,  $J=7.8$  Hz, 1H), 3.13 (d,  $J=7.2$  Hz, 2H), 2.30-2.27 (m, 2H), 1.53-1.46 (m, 2H), 0.79 (t,  $J=7.2$  Hz, 3H) ppm.  $^{13}\text{C}$  NMR ( $\text{CDCl}_3$ , 150 MHz):  $\delta$  208.9, 143.9, 128.5, 127.7, 126.3, 48.7, 45.9, 45.4, 16.9, 13.5 ppm. IR (neat) 3061(w), 3028(w), 2961(w), 2874(w), 1712(m), 698(s)  $\text{cm}^{-1}$ . HR-MS (ESI): calcd. for  $\text{C}_{18}\text{H}_{20}\text{NaO}$   $[\text{M}+\text{Na}]^+$  275.1406, found 275.1408.

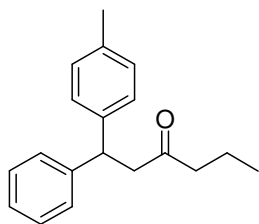

**1-Phenyl-1-p-tolylhexan-3-one (2l)**

84% yield (53 mg). Light yellow oil.  $^1\text{H}$  NMR ( $\text{CDCl}_3$ , 600 MHz):  $\delta$  7.24 (t,  $J=7.8$  Hz, 3H), 7.21-7.19 (m, 2H), 7.14 (t,  $J=7.2$  Hz, 3H), 7.10 (d,  $J=8.4$  Hz, 2H), 7.06 (d,  $J=8.4$  Hz, 2H), 4.57 (t,  $J=7.8$  Hz, 1H), 3.11 (d,  $J=7.2$  Hz, 2H), 2.29-2.26 (m, 5H), 1.49 (sext,  $J=7.2$  Hz, 2H), 0.79 (t,  $J=7.2$  Hz, 3H) ppm.  $^{13}\text{C}$  NMR ( $\text{CDCl}_3$ , 150 MHz):  $\delta$  209.0, 144.2, 140.9, 135.8, 129.1, 128.4, 127.6, 127.5, 126.2, 48.8, 45.5, 45.4, 20.9, 16.9, 7.5 ppm. IR (neat) 3085(w), 3027(m), 2962(m), 2874(w), 1714(s), 698(s)  $\text{cm}^{-1}$ . HR-MS (ESI): calcd. for  $\text{C}_{19}\text{H}_{23}\text{O}$   $[\text{M}+\text{H}]^+$  267.1743, found 267.1744.

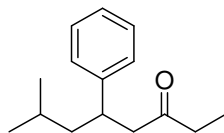

**7-Methyl-5-phenyloctan-3-one (2m)**

65% yield (35 mg). Colorless oil.  $^1\text{H}$  NMR ( $\text{CDCl}_3$ , 600 MHz)  $\delta$  7.29-7.26 (m, 2H), 7.18-7.16 (m, 3H), 3.27-3.22 (m, 1H), 2.70-2.60 (m, 2H), 2.34-2.27 (m, 1H), 2.21-2.15 (m, 1H), 1.59-1.54 (m, 1H), 1.40-

1.35 (m, 1H), 1.34-1.28 (m, 1H), 0.93 (t,  $J = 9.0$  Hz, 3H), 0.88 (d,  $J = 6.6$  Hz, 3H), 0.81 (d,  $J = 6.6$  Hz, 3H).  $^{13}\text{C}$  NMR ( $\text{CDCl}_3$ , 150 MHz)  $\delta$  210.6, 144.6, 128.4, 127.5, 126.2, 50.2, 45.5, 39.1, 36.7, 25.3, 23.5, 21.5, 7.5. IR (neat,  $\text{cm}^{-1}$ ) 3062(w), 3028(w), 2954(w), 2904(m), 1714(s), 700(s). HR-MS (ESI): calcd. for  $\text{C}_{15}\text{H}_{23}\text{O}$   $[\text{M}+\text{H}]^+$  219.1743, found 219.1743.

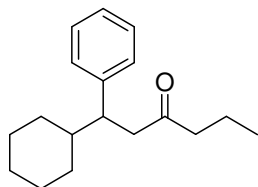

### 1-Cyclohexyl-1-phenylhexan-3-one (2n)

82% yield (53 mg). White solid, m. p.: 33-34 °C.  $^1\text{H}$  NMR ( $\text{CDCl}_3$ , 600 MHz)  $\delta$  7.25 (t,  $J=7.2$  Hz, 2H), 7.16 (t,  $J=7.2$  Hz, 2H), 2.97-2.94 (m, 1H), 2.81-2.70 (m, 2H), 2.27-2.22 (m, 1H), 2.16-2.11 (m, 1H), 1.79-1.72 (m, 1H), 1.63-1.58 (m, 2H), 1.48-1.41 (m, 4H), 1.27-1.17 (m, 1H), 1.31-1.03 (m, 2H), 0.97-0.90 (m, 1H), 0.81-0.78 (m, 1H), 0.75 (t,  $J=7.8$  Hz, 3H).  $^{13}\text{C}$  NMR ( $\text{CDCl}_3$ , 150 MHz)  $\delta$  210.5, 143.6, 128.3, 128.0, 126.1, 47.1, 46.6, 45.4, 42.9, 31.2, 30.7, 26.5, 26.3, 16.9, 13.5. IR (neat,  $\text{cm}^{-1}$ ) 3060(w), 3027(w), 2934(m), 2914(m), 2848(m), 1701(s), 740(s), 699(s). HR-MS (ESI): calcd. for  $\text{C}_{18}\text{H}_{27}\text{O}$   $[\text{M}+\text{H}]^+$  259.2056, found 259.2056.

**General procedure for asymmetric sequential Aldol condensation-Rh(I)-catalyzed addition reactions of aldehydes, methyl ketones and arylboronic acids:** In a glove-box, to a vial was charged with  $[\text{RhCl}(\text{CH}_2\text{CH}_2)_2]_2$  (1 mol %) and ligand (*R*)-**5** (3 equiv to Rh) and THF (0.6 mL), and the mixture was stirred at room temperature for 30 min. To another vial was charged with aldehyde (0.25 mmol), methyl ketone (0.2 mL),  $\text{K}_2\text{CO}_3$  (0.25 mmol), methanol (0.1 mL) and water (0.1 mL), and the mixture was taken out of the glove-box and stirred at 50 °C for 30 min. Then the yellow mixture was brought into drybox again and mixed with arylboronic acid (0.5 mmol) and prepared catalyst solution. Finally, the mixture was stirred at 0 °C for 4-6 hours. The reaction was quenched by adding 4 N HCl (2 mL) aqueous solution. The mixture was extracted with  $\text{CH}_2\text{Cl}_2$  (3 x 15 mL). The organic layers were combined. After evaporation of the organic solvents, the residue was subjected to column chromatography [silica gel, ethyl acetate/hexane (v/v=1:20) as eluent] to afford the products. The product was subjected to the analysis of enantiomeric excess by HPLC with Chiralcel OD column. The absolute configuration of which was determined by comparison of its specific rotation and the retention time of the HPLC analysis with the reported one.<sup>5</sup>

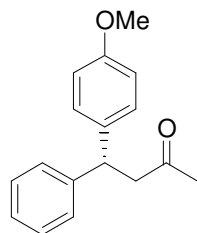

### (*R*)-4-(4-Methoxyphenyl)-4-phenylbutan-2-one<sup>5</sup>

80 % yield (51 mg).  $[\alpha]_{\text{D}} = 15.42$  ( $\text{CHCl}_3$ ,  $c = 0.088$ ). 87% ee. [HPLC condition: Chiralcel OD column, *n*-hexane/2-propanol = 92/8, 1.0 ml/min, 230 nm UV detector,  $t = 12.05$  min for (*S*)-isomer and  $t = 14.08$  min for (*R*)-isomer].  $^1\text{H}$  NMR ( $\text{CDCl}_3$ , 600 MHz)  $\delta$  7.26 (t,  $J=7.2$  Hz, 4H), 7.21-7.19 (m, 2H), 7.17-7.12 (m, 3H), 6.82-6.79(m, 2H), 4.53 (t,  $J=7.2$  Hz, 1H), 3.70 (s, 3H), 3.14 (d,  $J=7.8$  Hz, 1H), 2.06 (3H, s).

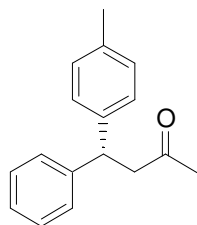

**(R)-4-Phenyl-4-p-tolylbutan-2-one**<sup>6</sup>

84% yield (50 mg).  $[\alpha]_D = 11.39$  ( $\text{CHCl}_3$ ,  $c = 0.154$ ). 92% e. e. [HPLC condition: Chiralcel OD column, *n*-hexane/2-propanol = 92/8, 1.0 ml/min, 230 nm UV detector,  $t = 9.06$  min for (*S*)-isomer and  $t = 10.57$  min for (*R*)-isomer]. <sup>1</sup>H NMR ( $\text{CDCl}_3$ , 600 MHz)  $\delta$  7.27-7.24 (m, 2H), 7.21-7.20 (m, 2H), 7.17-7.14 (m, 1H), 7.11-7.06 (m, 4H), 4.57 (t,  $J=7.2$  Hz, 1H), 3.13 (d,  $J=7.2$  Hz, 2H), 2.28 (s, 3H), 2.06 (s, 3H).

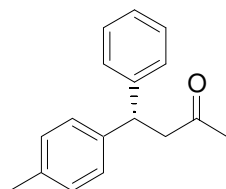

**(S)-4-Phenyl-4-p-tolylbutan-2-one**<sup>6</sup>

86% yield (51 mg).  $[\alpha]_D = -10.98$  ( $\text{CHCl}_3$ ,  $c = 0.108$ ). 91% e. e. [HPLC condition: Chiralcel OD column, *n*-hexane/2-propanol = 92/8, 1.0 ml/min, 230 nm UV detector,  $t = 8.68$  min for (*S*)-isomer and  $t = 10.44$  min for (*R*)-isomer]. <sup>1</sup>H NMR ( $\text{CDCl}_3$ , 600 MHz)  $\delta$  7.27-7.24 (m, 2H), 7.21-7.20 (m, 2H), 7.17-7.14 (m, 1H), 7.11-7.06 (m, 4H), 4.57 (t,  $J=7.2$  Hz, 1H), 3.13 (d,  $J=7.2$  Hz, 2H), 2.28 (s, 3H), 2.06 (s, 3H).

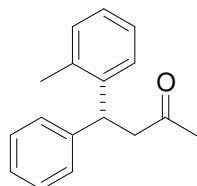

**(R)-4-Phenyl-4-o-tolylbutan-2-one**<sup>2</sup>

87% yield (52 mg).  $[\alpha]_D = -89.28$  ( $\text{CHCl}_3$ ,  $c = 0.050$ ). 82% e. e. [HPLC condition: Chiralcel OD column, *n*-hexane/2-propanol = 88/12, 1.0 ml/min, 230 nm UV detector,  $t = 10.08$  min for the isomer in a minor amount and  $t = 13.52$  min for the isomer in a major amount]. <sup>1</sup>H NMR ( $\text{CDCl}_3$ , 600 MHz)  $\delta$  7.25-7.22 (m, 4H), 7.17-7.12 (m, 5H), 4.78 (t,  $J=7.2$  Hz, 1H), 3.14 (d,  $J=7.2$  Hz, 2H), 2.29 (s, 3H), 2.06 (s, 3H).

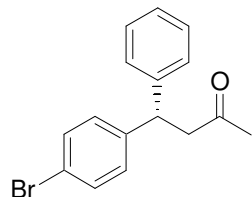

**(S)-4-(4-Bromophenyl)-4-phenylbutan-2-one**

87% yield (66 mg).  $[\alpha]_D = -7.95$  ( $\text{CHCl}_3$ ,  $c = 0.100$ ). 83% e. e. [HPLC condition: Chiralcel OD column, *n*-hexane/2-propanol = 88/12, 1.0 ml/min, 230 nm UV detector,  $t = 10.79$  min for the isomer in a major amount and  $t = 14.49$  min for the isomer in a minor amount]. <sup>1</sup>H NMR ( $\text{CDCl}_3$ , 600 MHz)  $\delta$  7.38 (d,  $J=7.8$  Hz, 2H), 7.27 (t,  $J=7.8$  Hz, 2H), 7.18-7.17 (m, 3H), 7.09 (d,  $J=8.4$  Hz, 2H), 4.55 (t,  $J=7.2$  Hz, 1H), 3.15 (d,  $J=7.2$  Hz, 1H), 2.07 (3H, s).

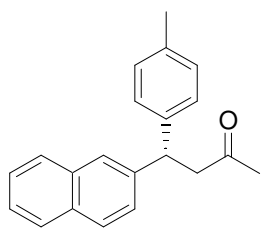

**(S)-4-(Naphthalen-2-yl)-4-p-tolylbutan-2-one**

85% yield (61 mg).  $[\alpha]_D = 32.90$  ( $\text{CHCl}_3$ ,  $c = 0.113$ ). 86% e. e. [HPLC condition: Chiralcel OD column, *n*-hexane/2-propanol = 94/6, 1.0 ml/min, 230 nm UV detector,  $t = 10.08$  min for the isomer in a minor amount and  $t = 13.52$  min for the isomer in a major amount].  $^1\text{H NMR}$  ( $\text{CDCl}_3$ , 600 MHz)  $\delta$  7.77 (t,  $J=7.8$  Hz, 2H), 7.73 (d,  $J=8.4$  Hz, 1H), 7.67 (m, 4H), 7.45-7.40 (m, 2H), 7.31 (d,  $J=8.4$  Hz, 1H), 7.15-7.03 (m, 4H), 4.71 (t,  $J=7.2$  Hz, 1H), 3.25 (t,  $J=7.8$  Hz, 2H), 2.28 (s, 3H), 2.09 (s, 3H).

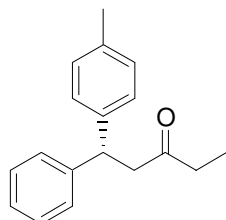

**(R)-1-Phenyl-1-p-tolylpentan-3-one**

81% yield (51 mg).  $[\alpha]_D = -26.57$  ( $\text{CHCl}_3$ ,  $c = 0.066$ ). 87% e. e. [HPLC condition: Chiralcel OD column, *n*-hexane/2-propanol = 96/4, 1.0 ml/min, 230 nm UV detector,  $t = 7.67$  min for the isomer in a minor amount and  $t = 8.53$  min for the isomer in a major amount].  $^1\text{H NMR}$  ( $\text{CDCl}_3$ , 600 MHz)  $\delta$  7.27-7.24 (m, 2H), 7.20-7.19 (m, 2H), 7.17-7.14 (m, 1H), 7.11-7.07 (m, 4H), 4.54 (t,  $J=7.2$  Hz, 1H), 3.15 (d,  $J=7.2$  Hz, 2H), 2.33 (q,  $J=7.2$  Hz, 2H), 2.28 (s, 3H), 0.95 (t,  $J=7.2$  Hz, 3H).

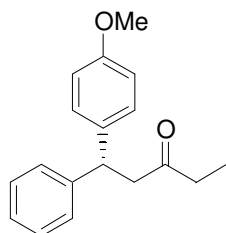

**(R)-1-(4-Methoxyphenyl)-1-phenylpentan-3-one**

80% yield (54 mg).  $[\alpha]_D = -15.30$  ( $\text{CHCl}_3$ ,  $c = 0.088$ ). 82% e. e. [HPLC condition: Chiralcel OD column, *n*-hexane/2-propanol = 94/6, 1.0 ml/min, 230 nm UV detector,  $t = 10.37$  min for the isomer in a minor amount and  $t = 11.39$  min for the isomer in a major amount].  $^1\text{H NMR}$  ( $\text{CDCl}_3$ , 600 MHz)  $\delta$  7.27-7.24 (m, 2H), 7.21-7.20 (m, 2H), 7.17-7.12 (3 m, H), 6.81-6.80 (m, 2H), 4.55 (t,  $J=7.2$  Hz, 1H), 3.75 (s, 3H), 3.11 (d,  $J=7.8$  Hz, 2H), 2.32 (q,  $J=7.2$  Hz, 2H), 0.95 (t,  $J=7.2$  Hz, 3H).

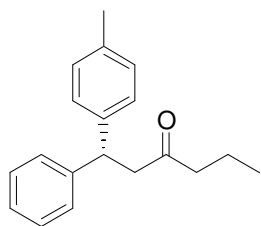

**(R)-1-Phenyl-1-p-tolylhexan-3-one**

83% yield (55 mg).  $[\alpha]_D = -0.55$  ( $\text{CHCl}_3$ ,  $c = 0.150$ ). 86% e. e. [HPLC condition: Chiralcel OD column, *n*-hexane/2-propanol = 99/1, 1.0 ml/min, 230 nm UV detector,  $t = 8.87$  min for the isomer in a minor amount and  $t = 9.46$  min for the isomer in a major amount].  $^1\text{H NMR}$  ( $\text{CDCl}_3$ , 600 MHz):  $\delta$  7.24 (t,  $J=7.8$

Hz, 3H), 7.21-7.19 (m, 2H), 7.14 (t,  $J=7.2$  Hz, 3H), 7.10 (d,  $J=8.4$  Hz, 2H), 7.06 (d,  $J=8.4$  Hz, 2H), 4.57 (t,  $J=7.8$  Hz, 1H), 3.11 (d,  $J=7.2$  Hz, 2H), 2.29-2.26 (m, 5H), 1.49 (m, 2H), 0.79 (t,  $J=7.2$  Hz, 3H).

**References:**

1. Bedford, R. B.; Hazelwood, S. L.; Limmert, M. E.; Albisson, D. A.; Draper, S. M.; Scully, P. N.; Coles, S. J.; Hursthouse, M. B. *Chem. Eur. J.* **2003**, *9*, 3216-3227.
2. He, P.; Lu, Y.; Dong, C.-G., Hu, Q.-S. *Org. Lett.* **2007**, *9*, 343-346.
3. Liao, Y.-X; Xing, C.-H; He, P; Hu, Q.-S. *Org. Lett.* **2008**, *10*, 2509-2512.
4. Duan, H.-F.; Xie, J.-H.; Shi, W.-J.; Zhang, Q.; Zhou, Q.-L. *Org. Lett.* **2006**, *8*, 1479-1481.
5. Chen, Q.; Kuriyama, M.; Hao, X.; Soeta, T.; Yamamoto, Y.; Yamada, K.-I.; Tomioka, K. *Chem. Pharm. Bull.* **2009**, *57*, 1024—1027. HPLC conditions: (OD-H, hexane/*i*-PrOH=50/1, 1.0 ml/min, 254 nm; major 37.4 min, minor 44.7 min).
6. Nishimura T.; Nagaosa, M.; Hayashi, T. *Chem. Lett.* **2008**, *37*, 860-861.



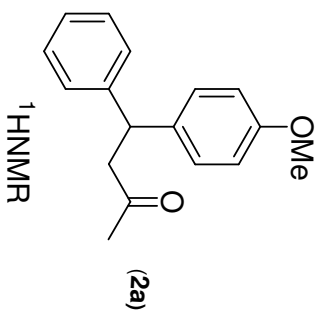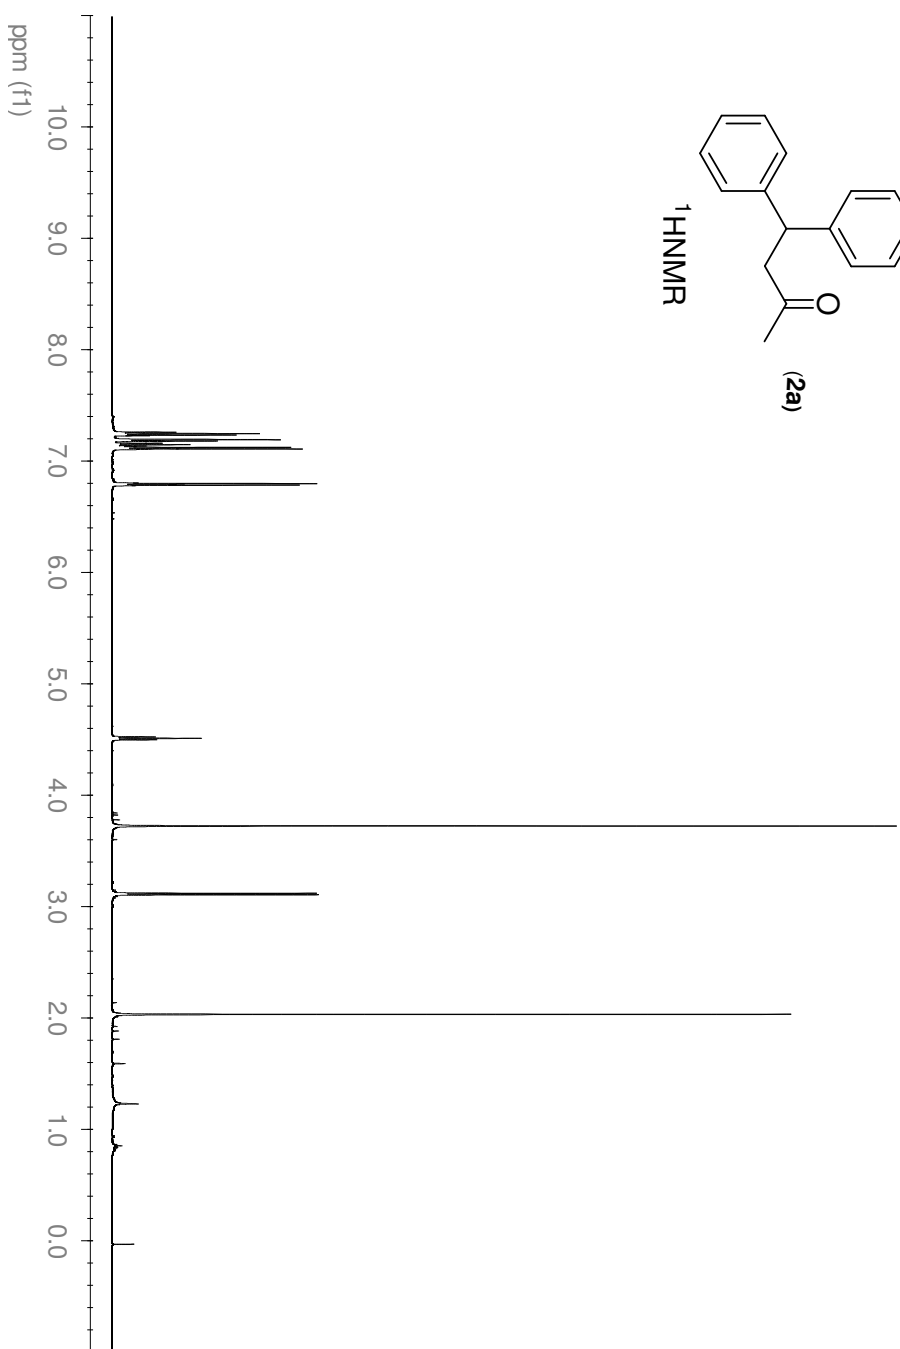

**Spectrum Title:**  
Jan0710\_lyx-4-58-2\_1H

**Frequency (MHz):**

(f1) 599.936

**Acquisition Time (sec):**

(f1) 2.0486

**Spectral Width (ppm):**

(f1) 16.027

**Pulse Program:**

s2pul

**Temperature:**

25

**Number of Scans:**

4

**Acq. Date:**

Jan 7 2010

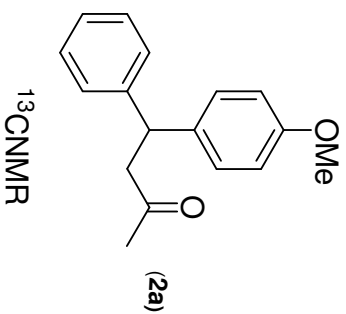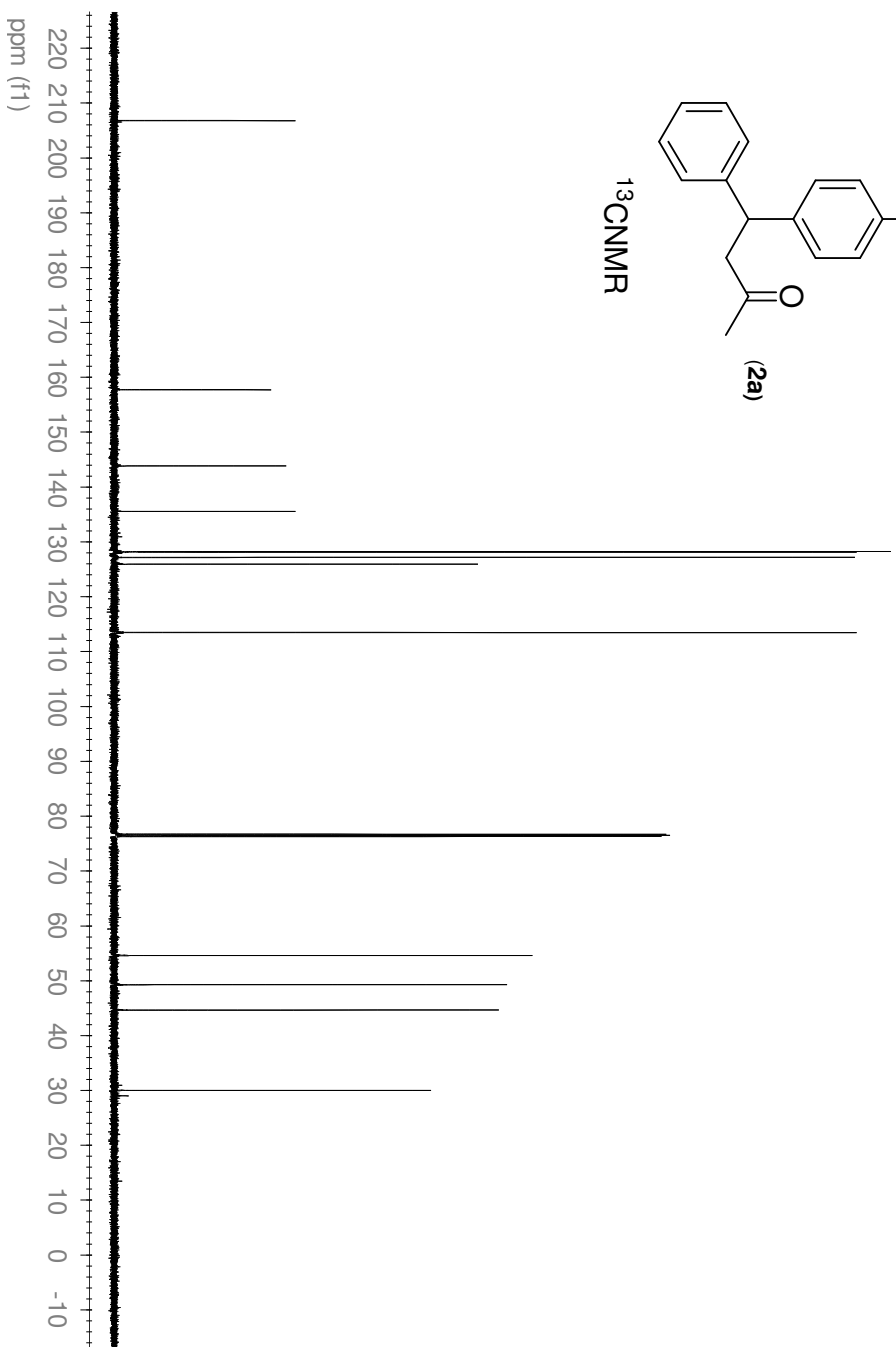

**Spectrum Title:**  
Jan0710\_lyx-4-88-2\_13C

**Frequency (MHz):**

(f1) 150.889

**Acquisition Time (sec):**

(f1) 1.3005

**Spectral Width (ppm):**

(f1) 243.886

**Pulse Program:**

sQpul

**Temperature:**

25

**Number of Scans:**

256

**Acq. Date:**

Jan 7 2010

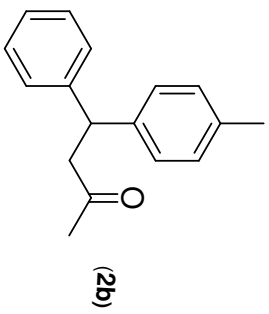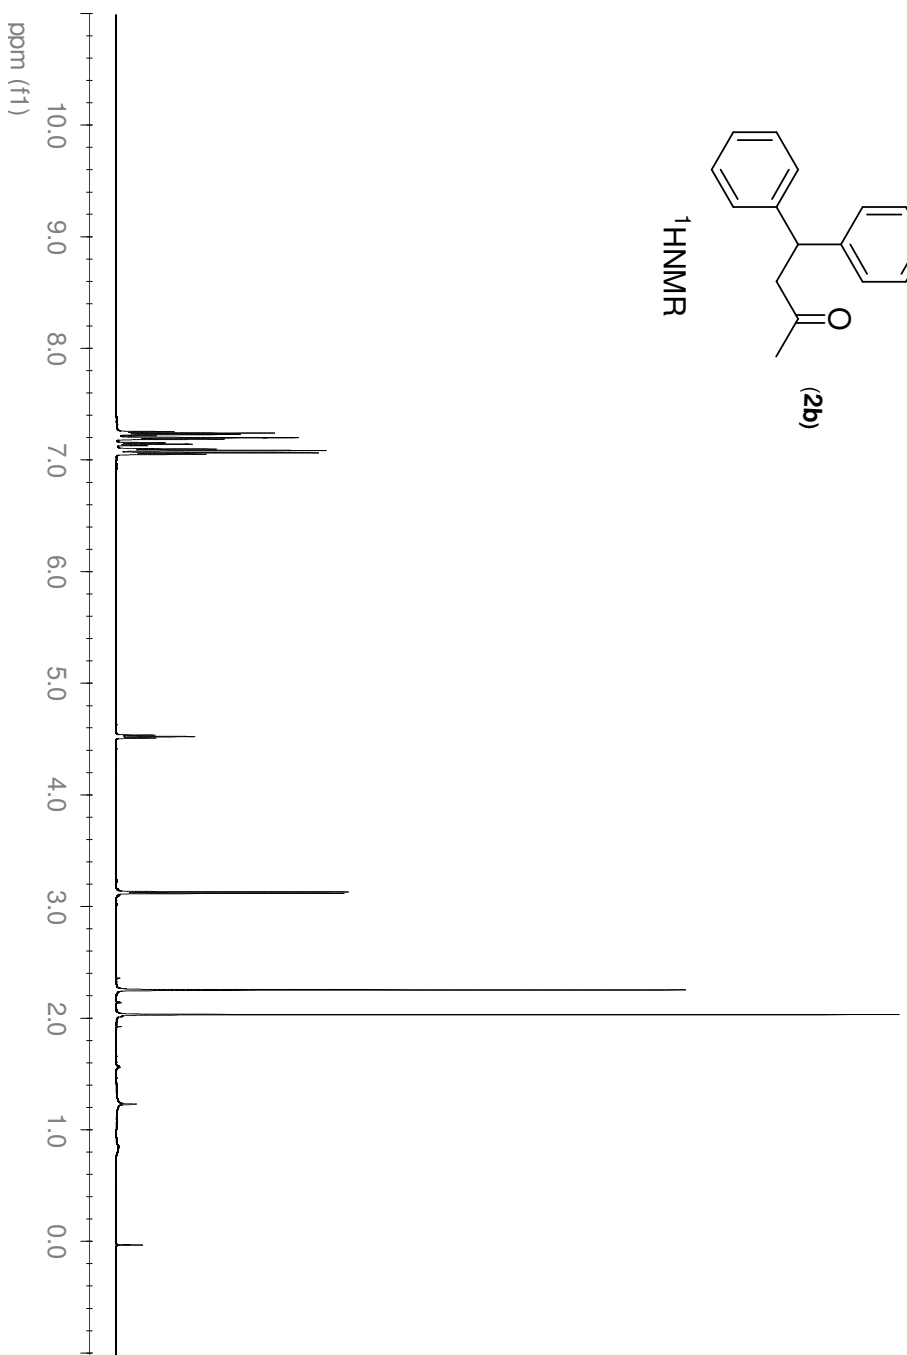

**Spectrum Title:**  
Mar1009\_lvx-3-87\_1H

**Frequency (MHz):**

(f1) 599.936

**Acquisition Time (sec):**

(f1) 2.0486

**Spectral Width (ppm):**

(f1) 16.027

**Pulse Program:**

s2pu1

**Temperature:**

25

**Number of Scans:**

8

**Acq. Date:**

Mar 10 2009

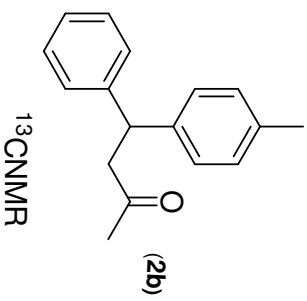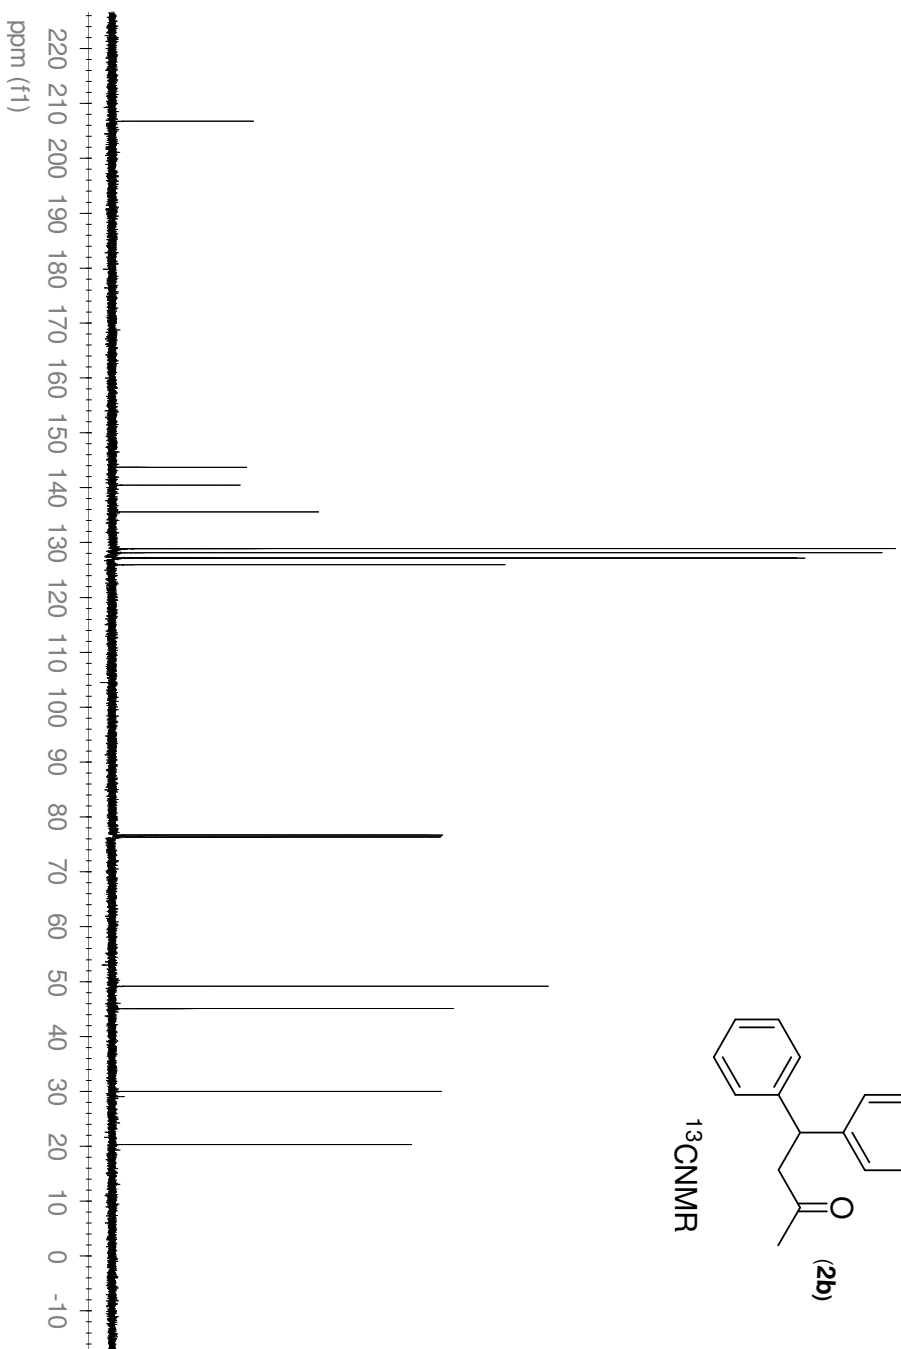

**Spectrum Title:**  
Mar1009\_lyx-3-87\_13C

**Frequency (MHz):**

(f1) 150.869

**Acquisition Time (sec):**

(f1) 1.3005

**Spectral Width (ppm):**

(f1) 243.686

**Pulse Program:**

s2pul

**Temperature:**

25

**Number of Scans:**

256

**Acq. Date:**

Mar 10 2009

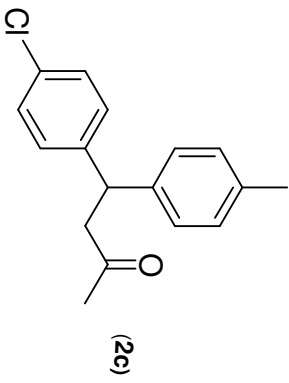

<sup>1</sup>H NMR

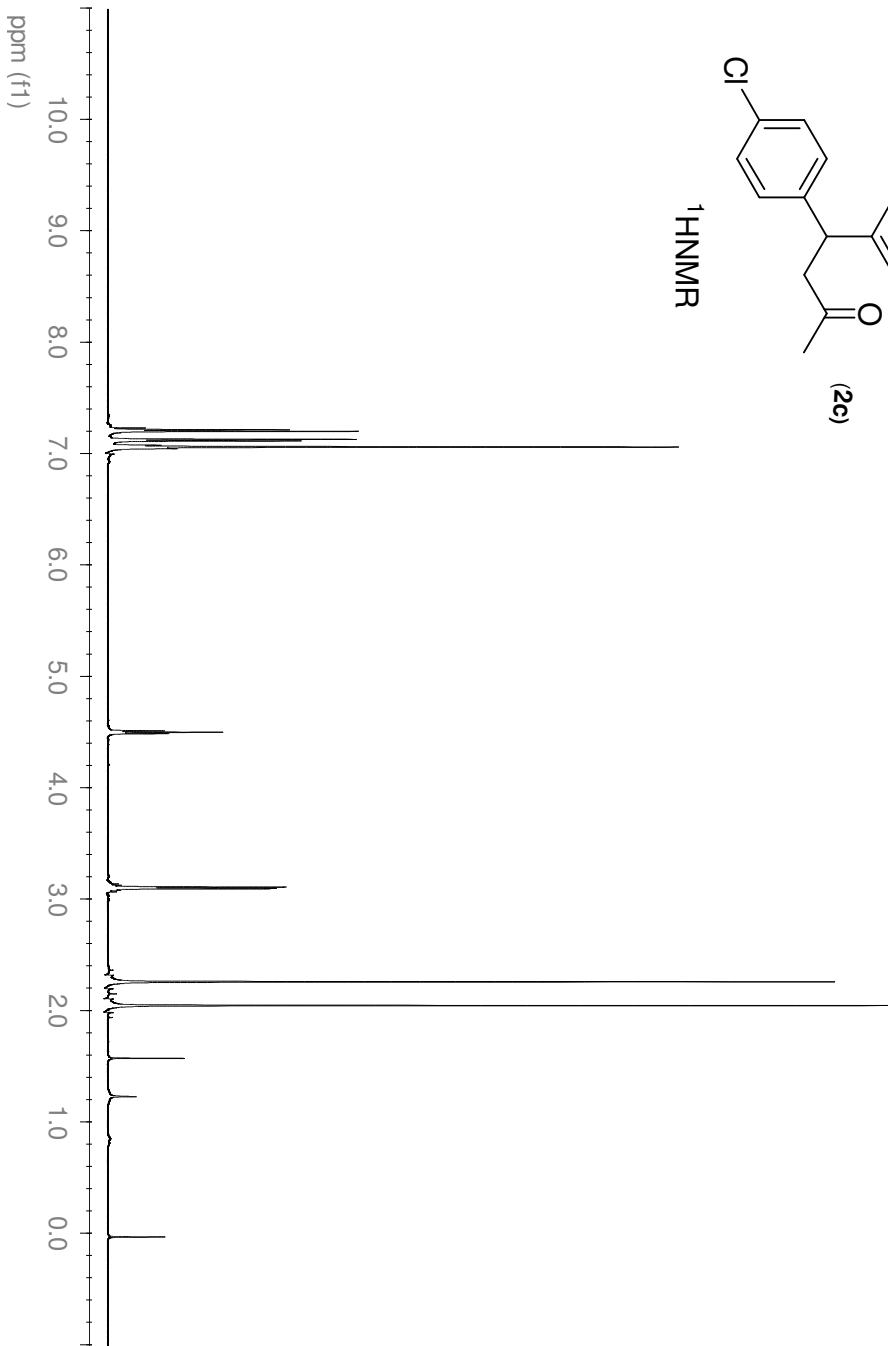

**Spectrum Title:**  
Jan2510\_ljx-461-1\_1H

**Frequency (MHz):**  
(f1) 599.336

**Acquisition Time (sec):**  
(f1) 2.0486

**Spectral Width (ppm):**  
(f1) 16.027

**Pulse Program:**  
s2pul

**Temperature:**  
27

**Number of Scans:**  
8

**Acq. Date:**  
Jan 25 2010

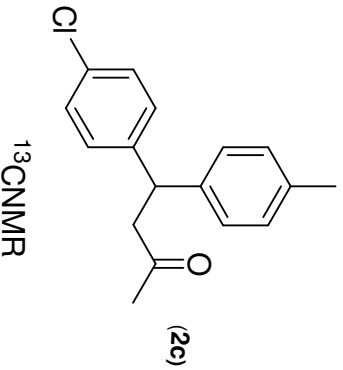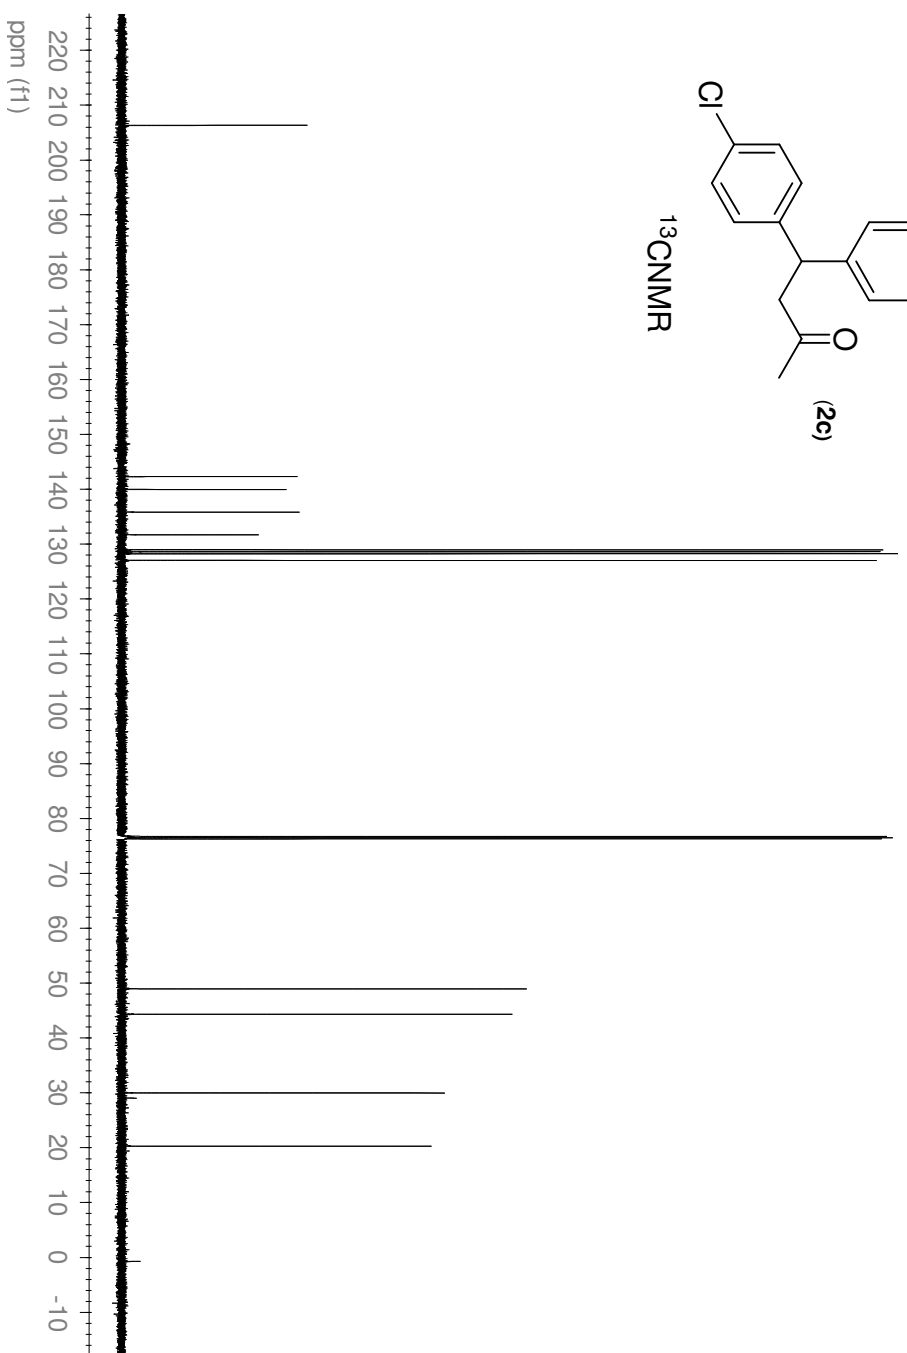

**Spectrum Title:**  
 Jan2510\_lyx-4-61-1\_13C  
**Frequency (MHz):**  
 (f1) 150.869  
**Acquisition Time (sec):**  
 (f1) 1.3005  
**Spectral Width (ppm):**  
 (f1) 243.686  
**Pulse Program:**  
 s2pul  
**Temperature:**  
 27  
**Number of Scans:**  
 256  
**Acq. Date:**  
 Jan 25 2010

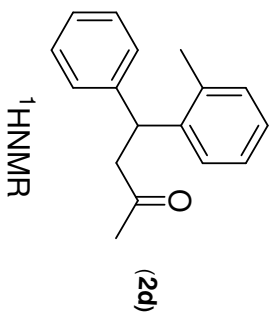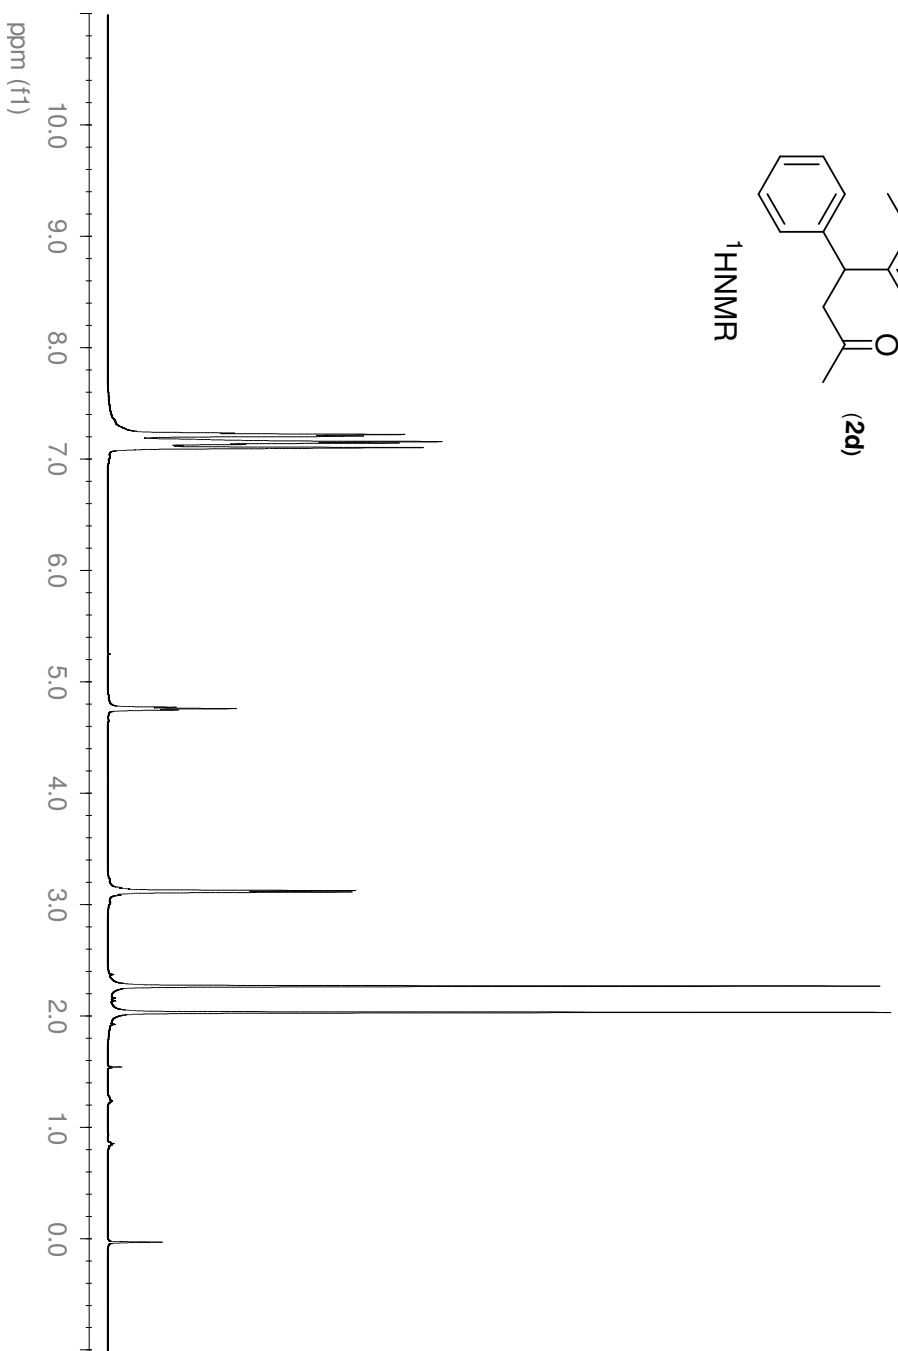

**Spectrum Title:**

Jan2910\_lyx-4-56-1\_1H

**Frequency (MHz):**

(f1) 599.936

**Acquisition Time (sec):**

(f1) 2.0486

**Spectral Width (ppm):**

(f1) 16.027

**Pulse Program:**

s2pul

**Temperature:**

27

**Number of Scans:**

8

**Acq. Date:**

Jan 29 2010

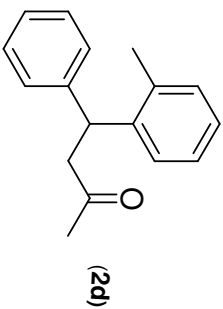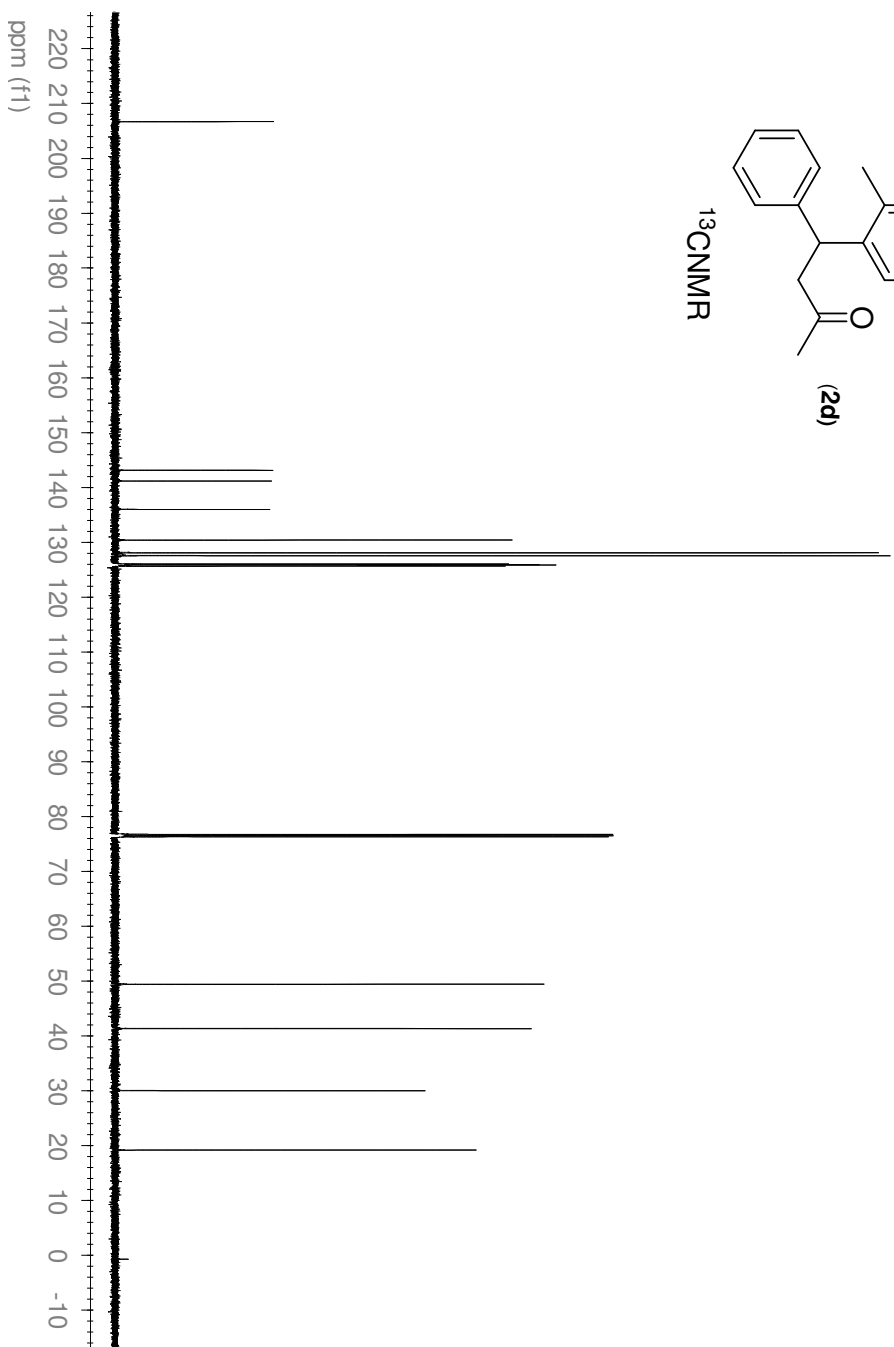

**Spectrum Title:**  
Jan2910\_lyx-4-56-1\_13C

**Frequency (MHz):**

(f1) 150.889

**Acquisition Time (sec):**

(f1) 1.3005

**Spectral Width (ppm):**

(f1) 243.696

**Pulse Program:**

s2pul

**Temperature:**

27

**Number of Scans:**

1000

**Acq. Date:**

Jan 29 2010



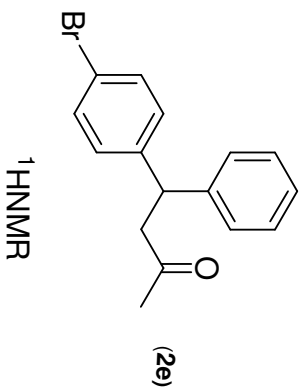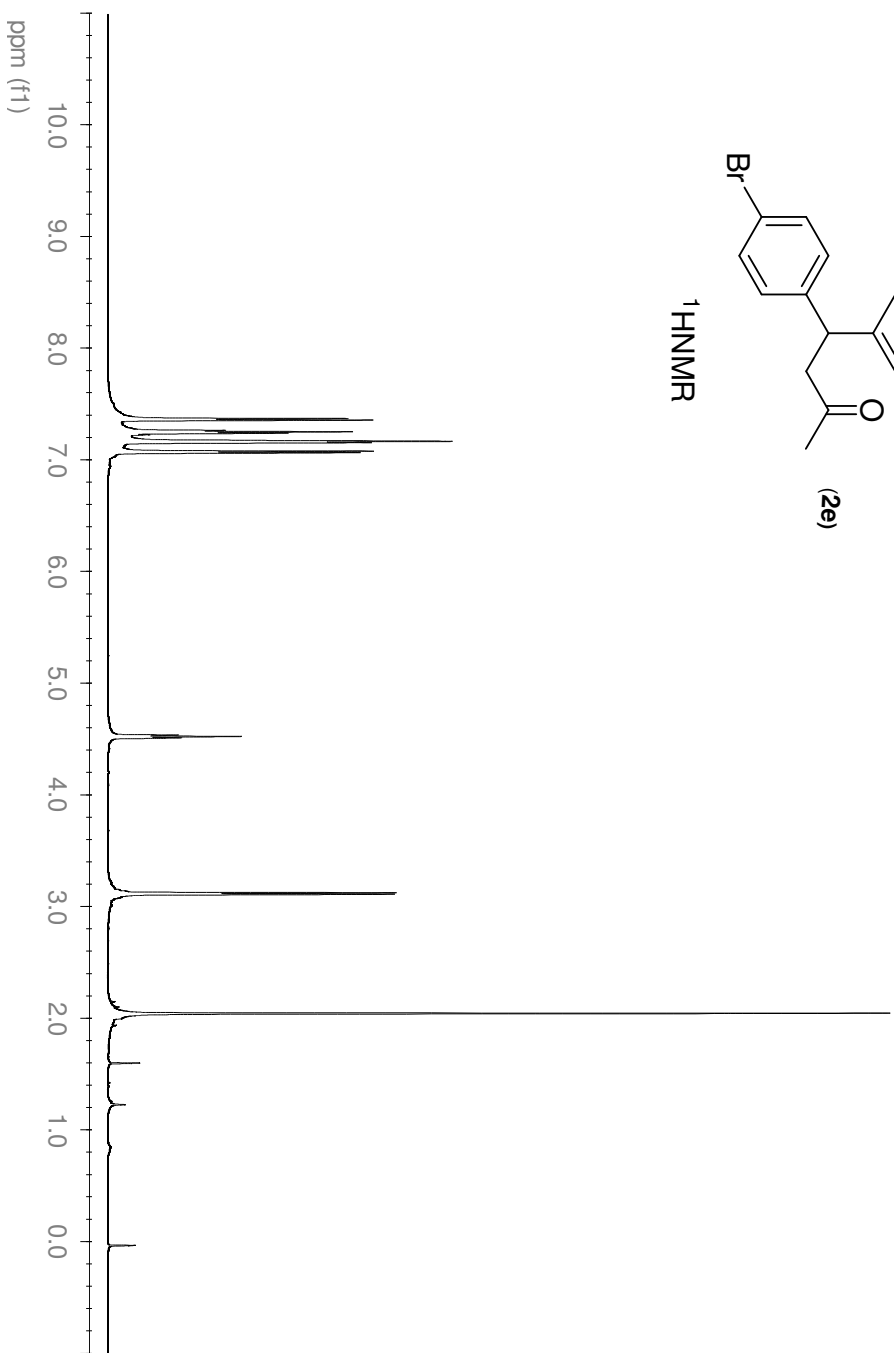

**Spectrum Title:**  
Feb0910\_Lyx-467-2\_1H

**Frequency (MHz):**  
(f1) 599.996

**Acquisition Time (sec):**  
(f1) 2.0486

**Spectral Width (ppm):**  
(f1) 16.027

**Pulse Program:**  
s2p1

**Temperature:**  
25

**Number of Scans:**  
512

**Acq. Date:**  
Feb 10 2010

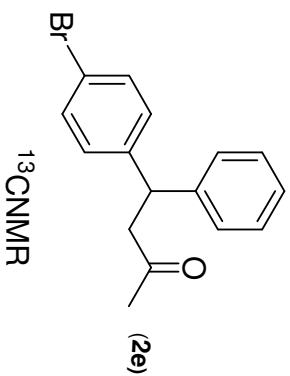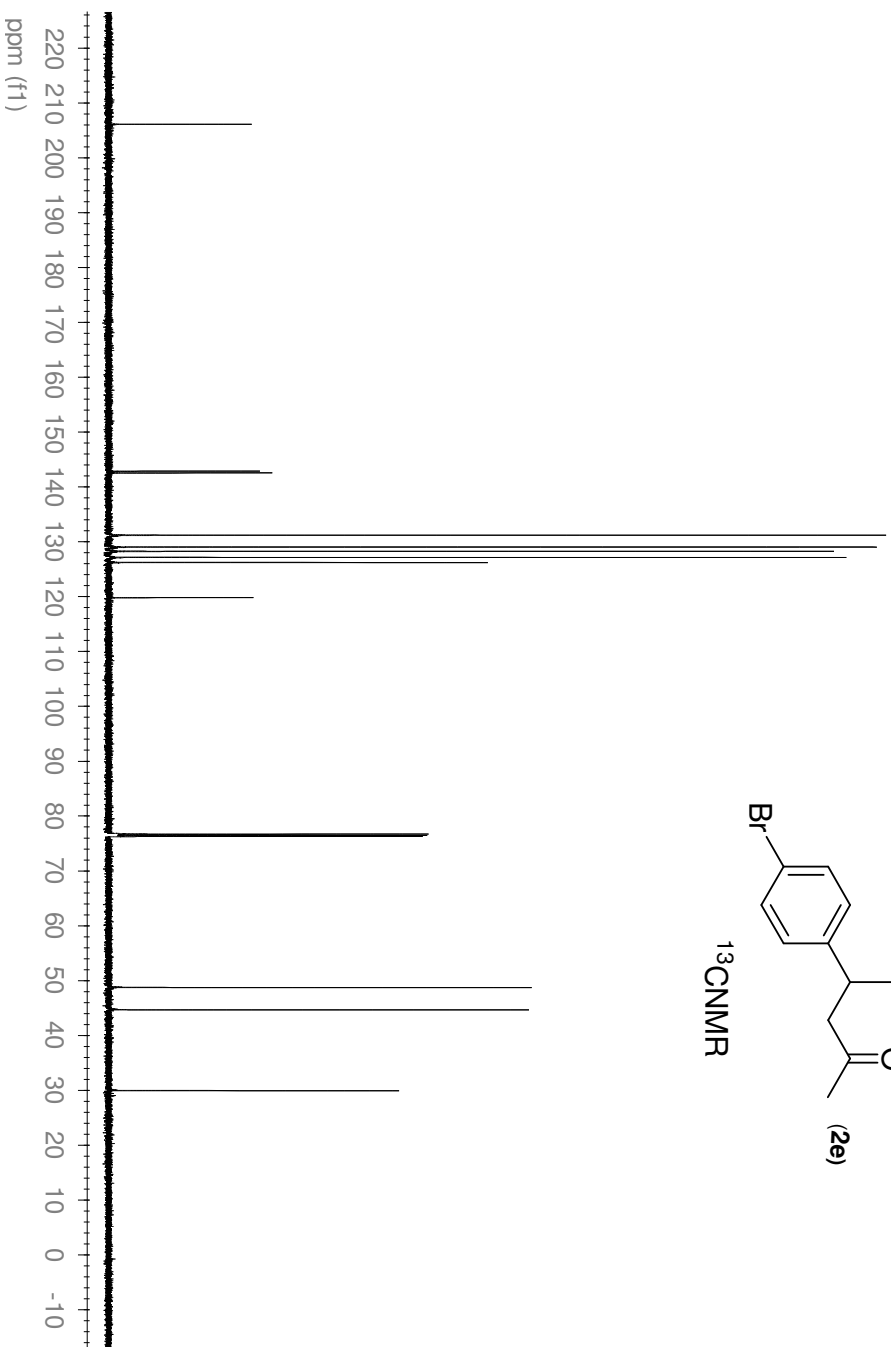

**Spectrum Title:**  
Feb0910\_lyx-4-67-2\_13C

**Frequency (MHz):**

(f1) 150.869

**Acquisition Time (sec):**

(f1) 1.3005

**Spectral Width (ppm):**

(f1) 243.696

**Pulse Program:**

s2pul

**Temperature:**

25

**Number of Scans:**

1000

**Acq. Date:**

Feb 10 2010

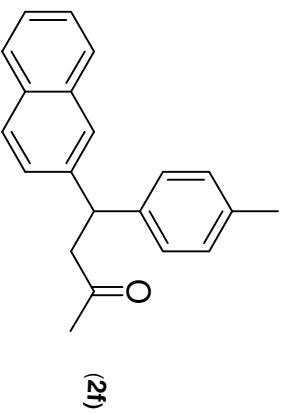

<sup>1</sup>H NMR

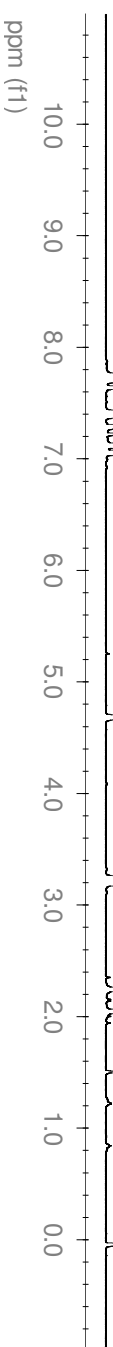

**Spectrum Title:**  
Jan2910\_lyx-4-61-2\_1H

**Frequency (MHz):**  
(f1) 599.936

**Acquisition Time (sec):**  
(f1) 2.0486

**Spectral Width (ppm):**  
(f1) 16.027

**Pulse Program:**  
s2pul

**Temperature:**  
27

**Number of Scans:**  
8

**Acq. Date:**  
Jan 29 2010

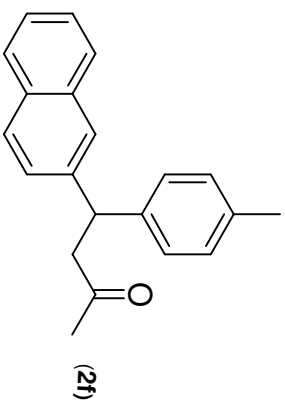

<sup>13</sup>CNMR

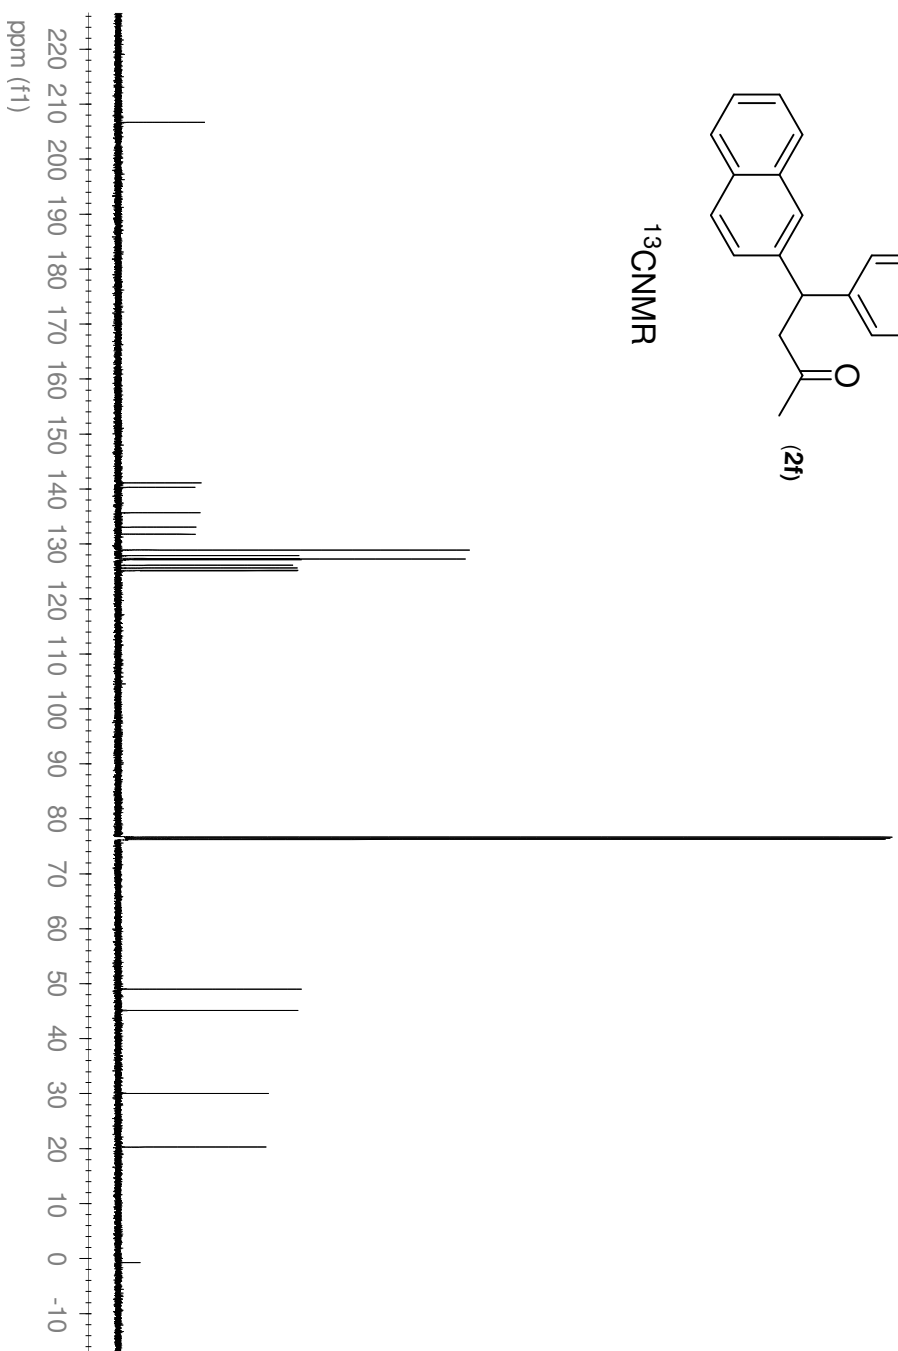

**Spectrum Title:**  
Jan2910\_ljx-4-6f-2\_13C

**Frequency (MHz):**  
(f1) 150.889

**Acquisition Time (sec):**  
(f1) 1.3005

**Spectral Width (ppm):**  
(f1) 243.686

**Pulse Program:**  
s2qa1

**Temperature:**  
27

**Number of Scans:**  
1000

**Acq. Date:**  
Jan 29 2010

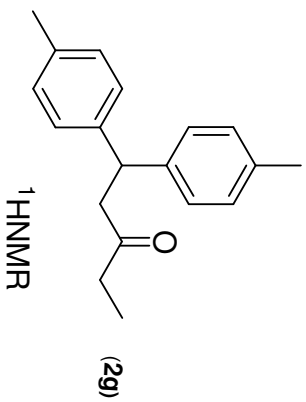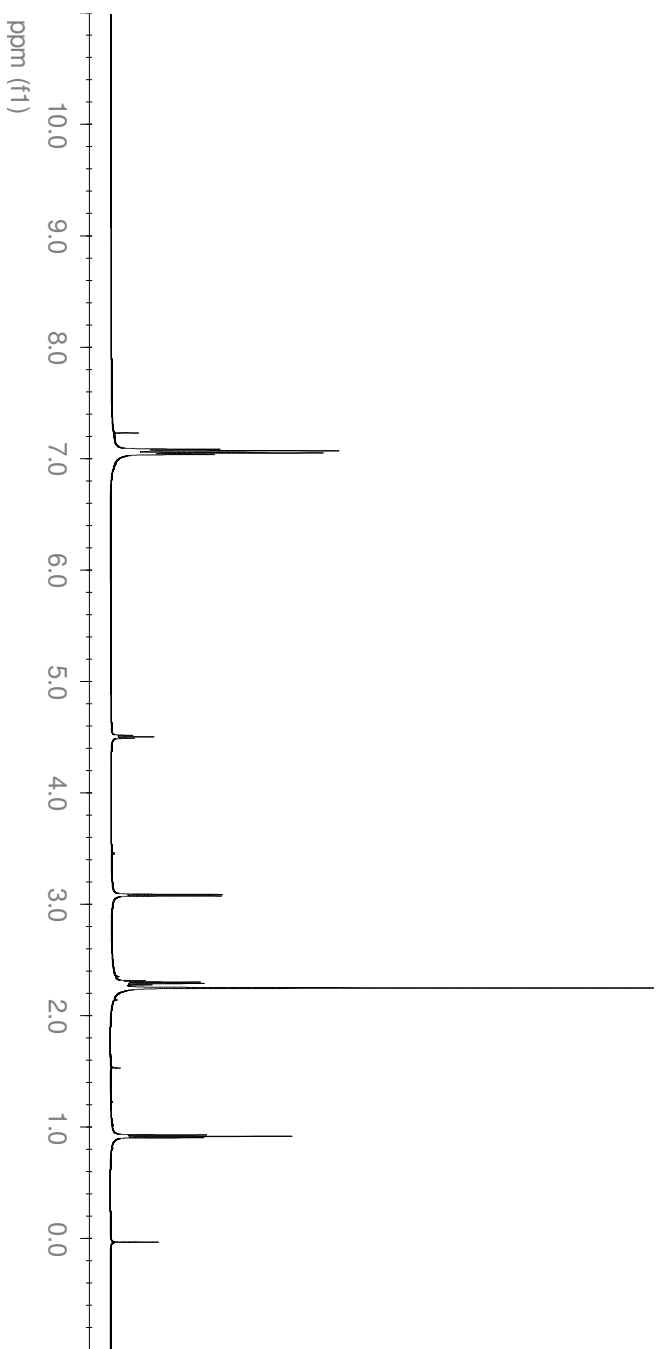

**Spectrum Title:**  
Feb0310\_lvx-4-64-3\_1H

**Frequency (MHz):**  
(f1) 599.936

**Acquisition Time (sec):**  
(f1) 2.0486

**Spectral Width (ppm):**  
(f1) 16.027

**Pulse Program:**  
s2pul

**Temperature:**  
25

**Number of Scans:**  
8

**Acq. Date:**  
Feb 3 2010

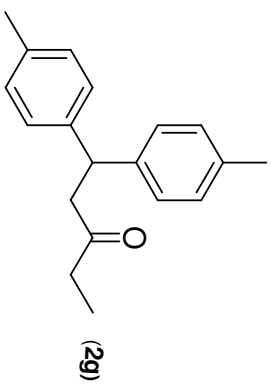

<sup>1</sup>H NMR

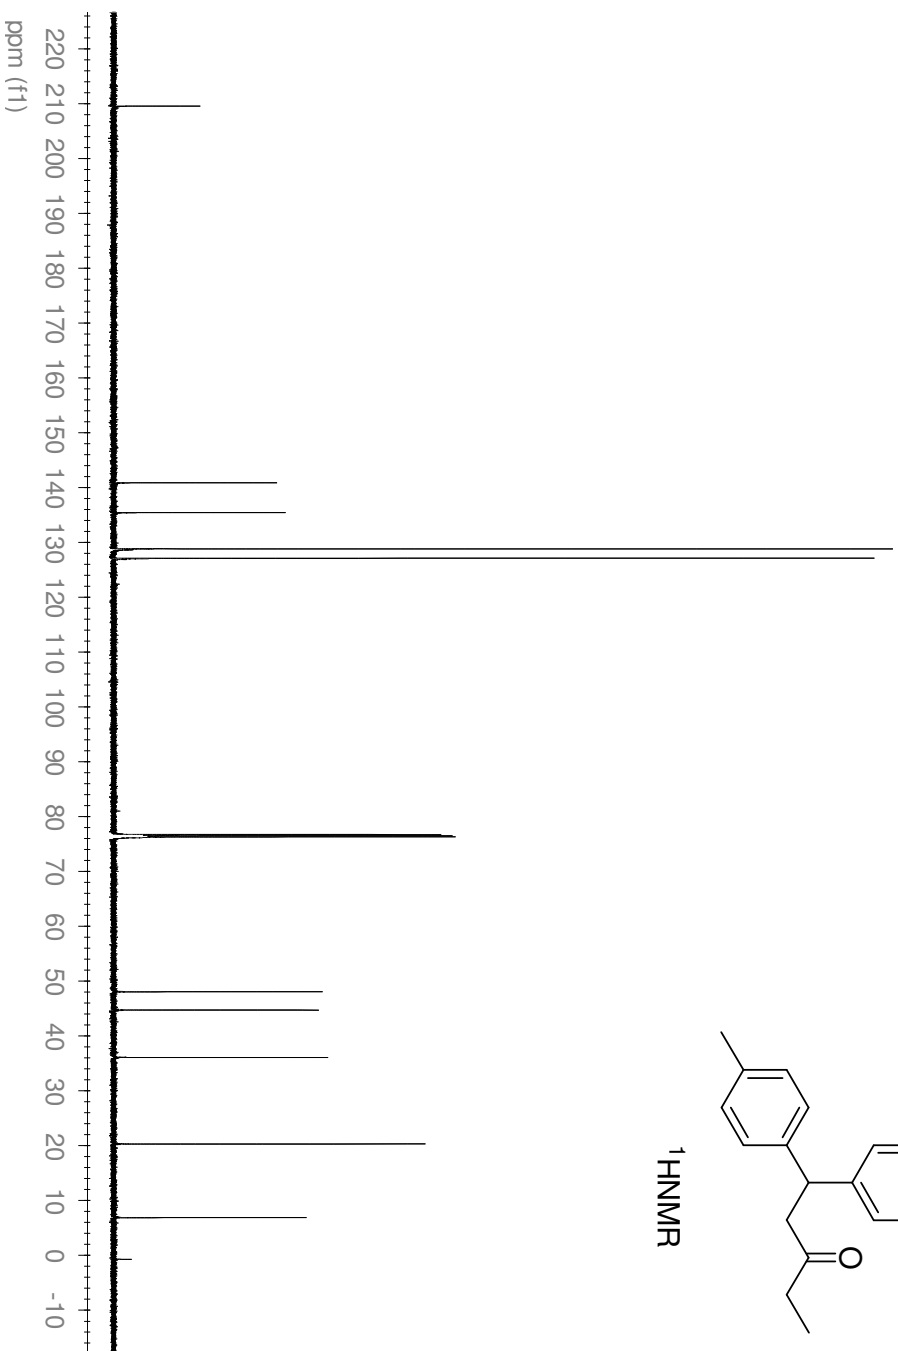

**Spectrum Title:**

F800310.lv\4-64-3\_13C

**Frequency (MHz):**

(f1) 150.869

**Acquisition Time (sec):**

(f1) 1.3005

**Spectral Width (ppm):**

(f1) 243.686

**Pulse Program:**

s2pul

**Temperature:**

25

**Number of Scans:**

256

**Acq. Date:**

Feb 3 2010

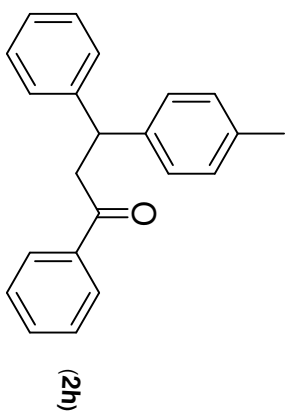

<sup>1</sup>H NMR

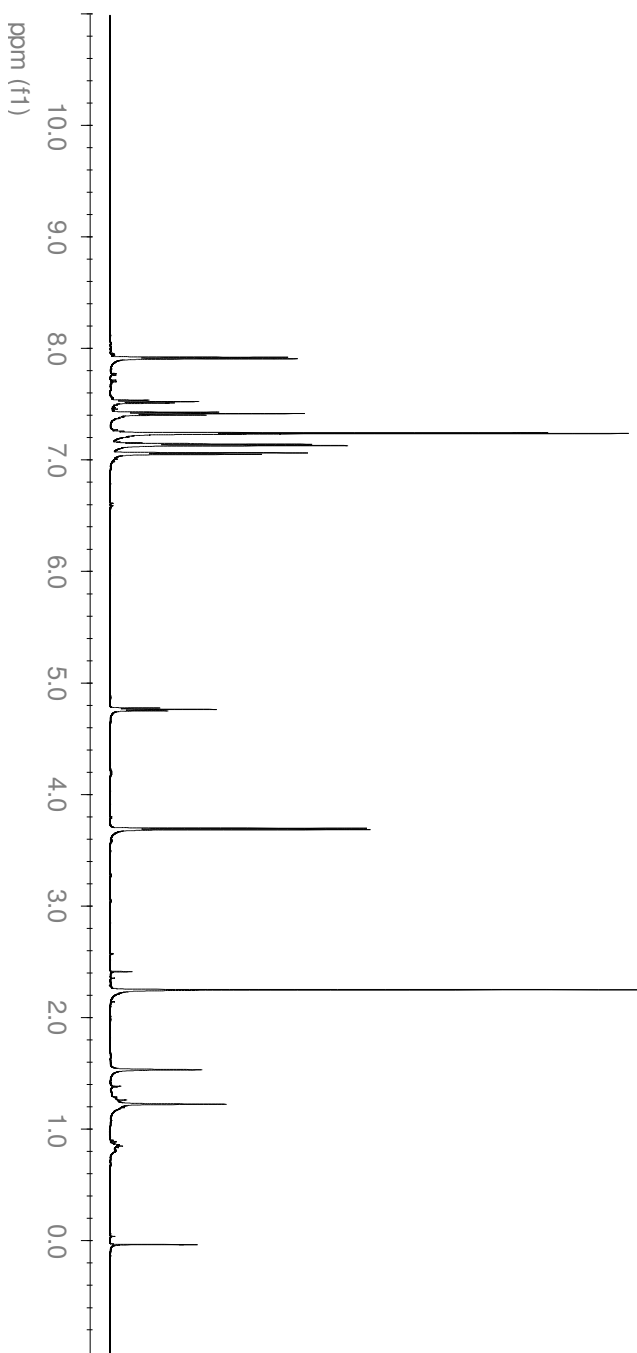

**Spectrum Title:**  
 Sep00909\_1yx-3-271\_1H

**Frequency (MHz):**  
 (f1) 599.996

**Acquisition Time (sec):**  
 (f1) 2.0488

**Spectral Width (ppm):**  
 (f1) 16.027

**Pulse Program:**  
 s2pu1

**Temperature:**  
 25

**Number of Scans:**  
 4

**Acq. Date:**  
 Sep 9 2009

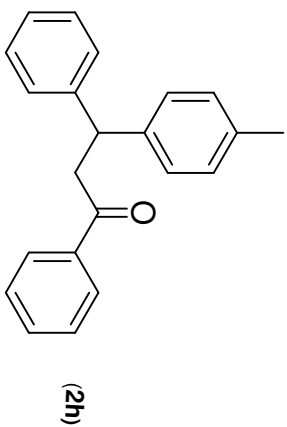

<sup>13</sup>CNMR

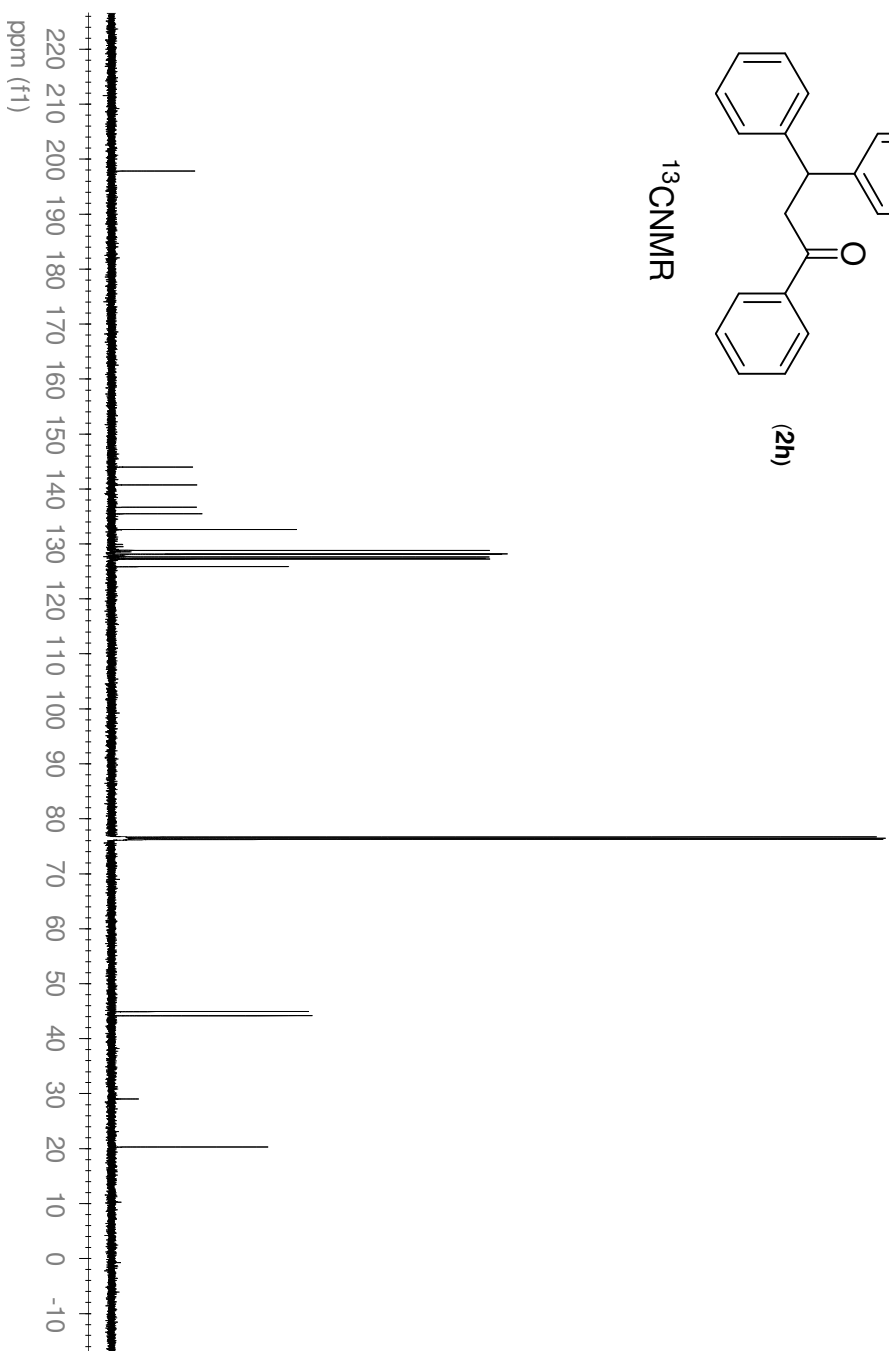

**Spectrum Title:**  
Sep0909\_lvx-3-271\_13C

**Frequency (MHz):**  
(f1) 150.889

**Acquisition Time (sec):**  
(f1) 1.3005

**Spectral Width (ppm):**  
(f1) 243.696

**Pulse Program:**  
s2pul

**Temperature:**  
25

**Number of Scans:**  
256

**Acq. Date:**  
Sep 9 2009



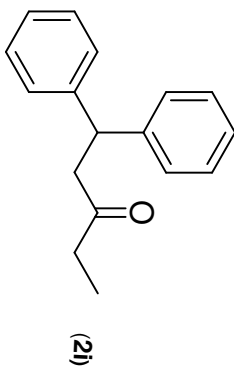

<sup>1</sup>H NMR

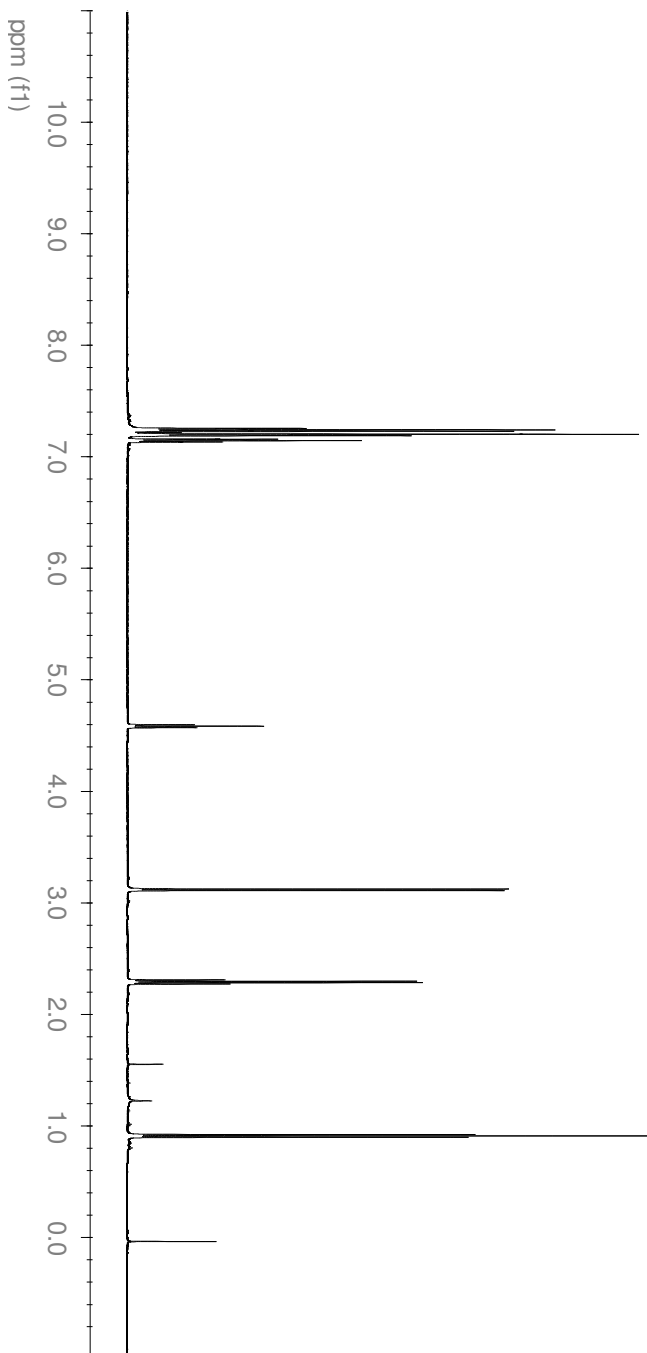

**Spectrum Title:**  
 JU0909\_1yx-3-143\_1H  
**Frequency (MHz):**  
 (f1) 599.936  
**Acquisition Time (sec):**  
 (f1) 2.0486  
**Spectral Width (ppm):**  
 (f1) 16.027  
**Pulse Program:**  
 sZpu  
**Temperature:**  
 25  
**Number of Scans:**  
 8  
**Acq. Date:**  
 Jul 8 2009

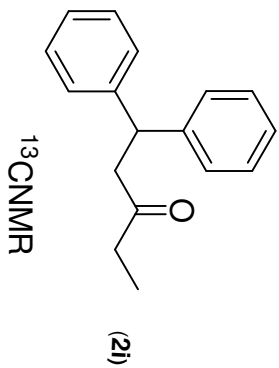

<sup>13</sup>CNMR

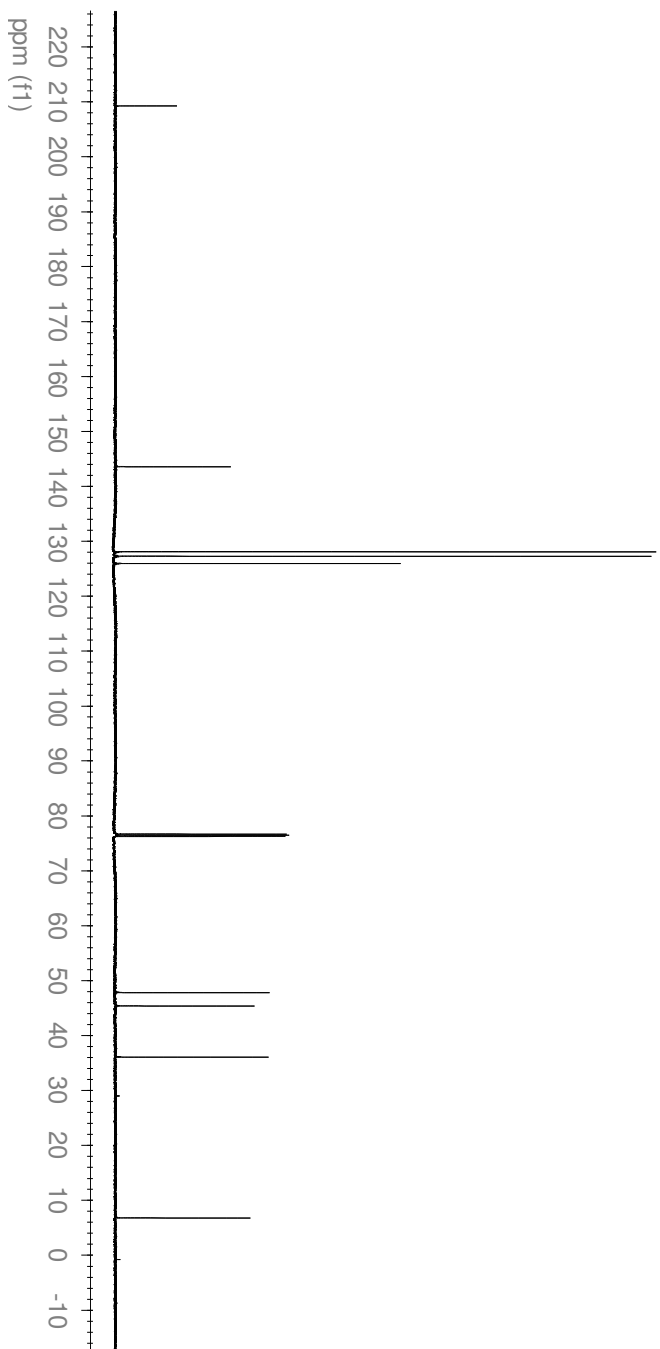

**Spectrum Title:**

JU0909\_lyx-3-143\_13C

**Frequency (MHz):**

(f1) 150.889

**Acquisition Time (sec):**

(f1) 1.3005

**Spectral Width (ppm):**

(f1) 243.696

**Pulse Program:**

s2p1

**Temperature:**

25

**Number of Scans:**

256

**Acq. Date:**

Jul 8 2009

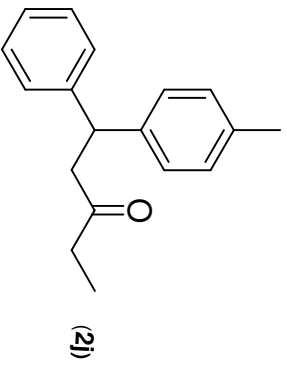

<sup>1</sup>H NMR

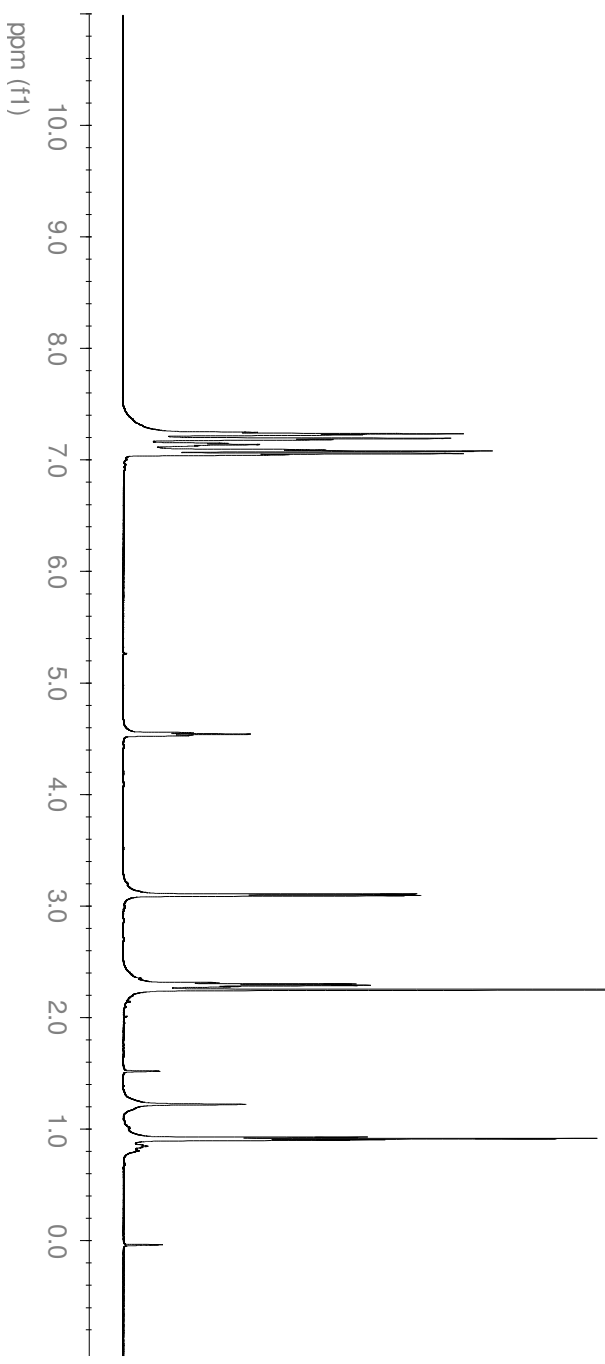

**Spectrum Title:**  
 Jan1210\_lyx4457-1\_1H  
**Frequency (MHz):**  
 (f1) 599.996  
**Acquisition Time (sec):**  
 (f1) 2.0488  
**Spectral Width (ppm):**  
 (f1) 16.027  
**Pulse Program:**  
 s2x1  
**Temperature:**  
 25  
**Number of Scans:**  
 8  
**Acq. Date:**  
 Jan 12 2010

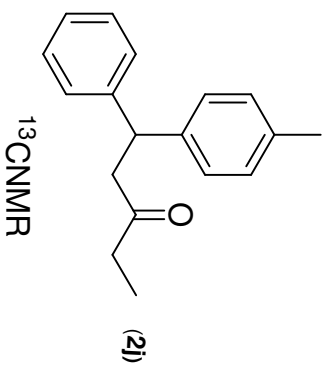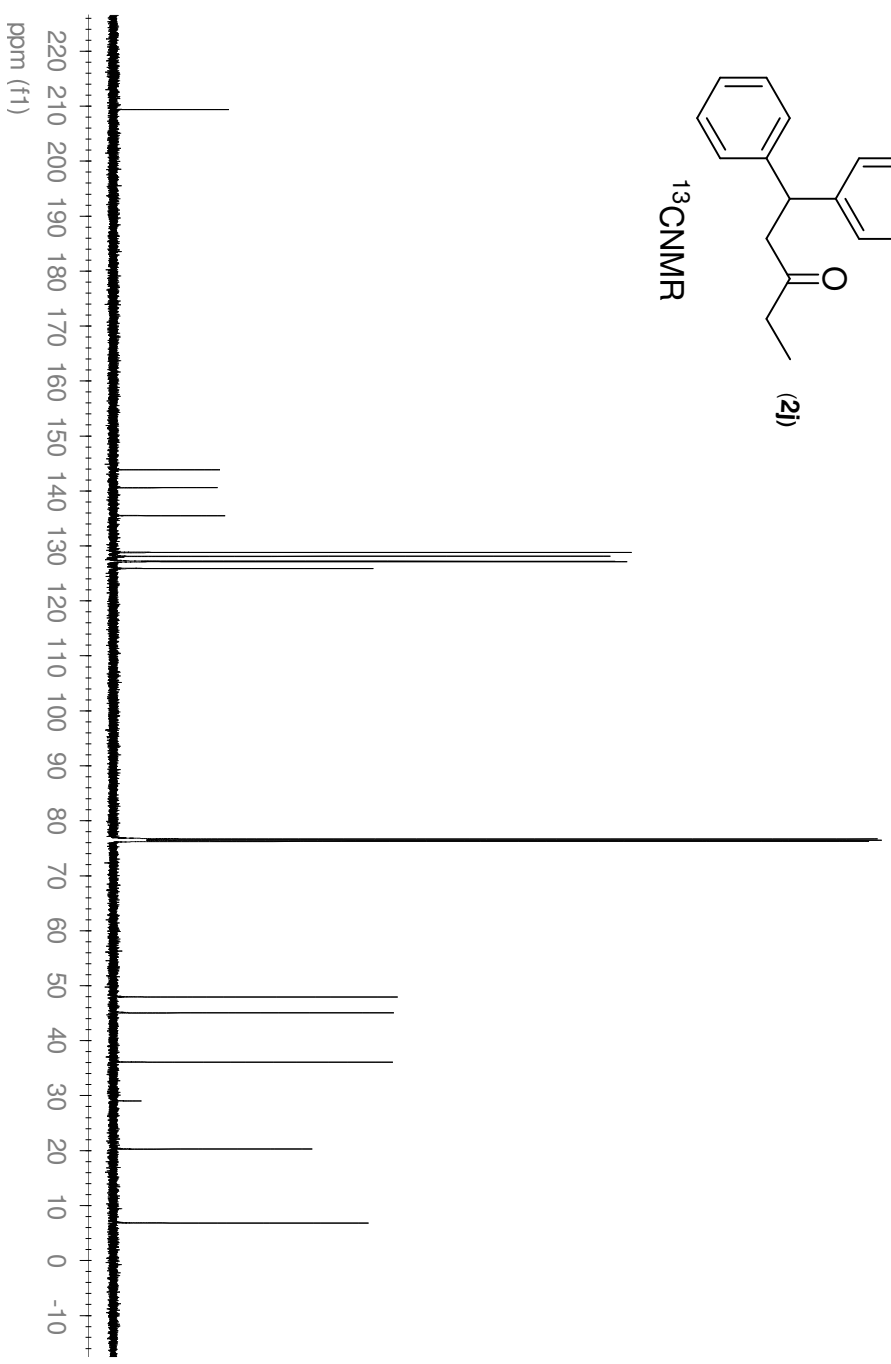

**Spectrum Title:**  
 Jan1210\_lvx-4-57-1\_13C

**Frequency (MHz):**  
 (f1) 150.889

**Acquisition Time (sec):**  
 (f1) 1.3005

**Spectral Width (ppm):**  
 (f1) 243.696

**Pulse Program:**  
 s2pul

**Temperature:**  
 25

**Number of Scans:**  
 256

**Acq. Date:**  
 Jan 12 2010

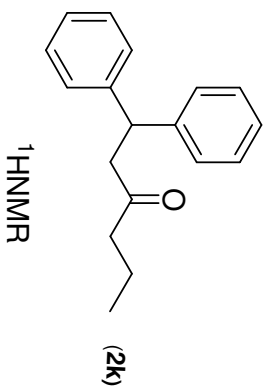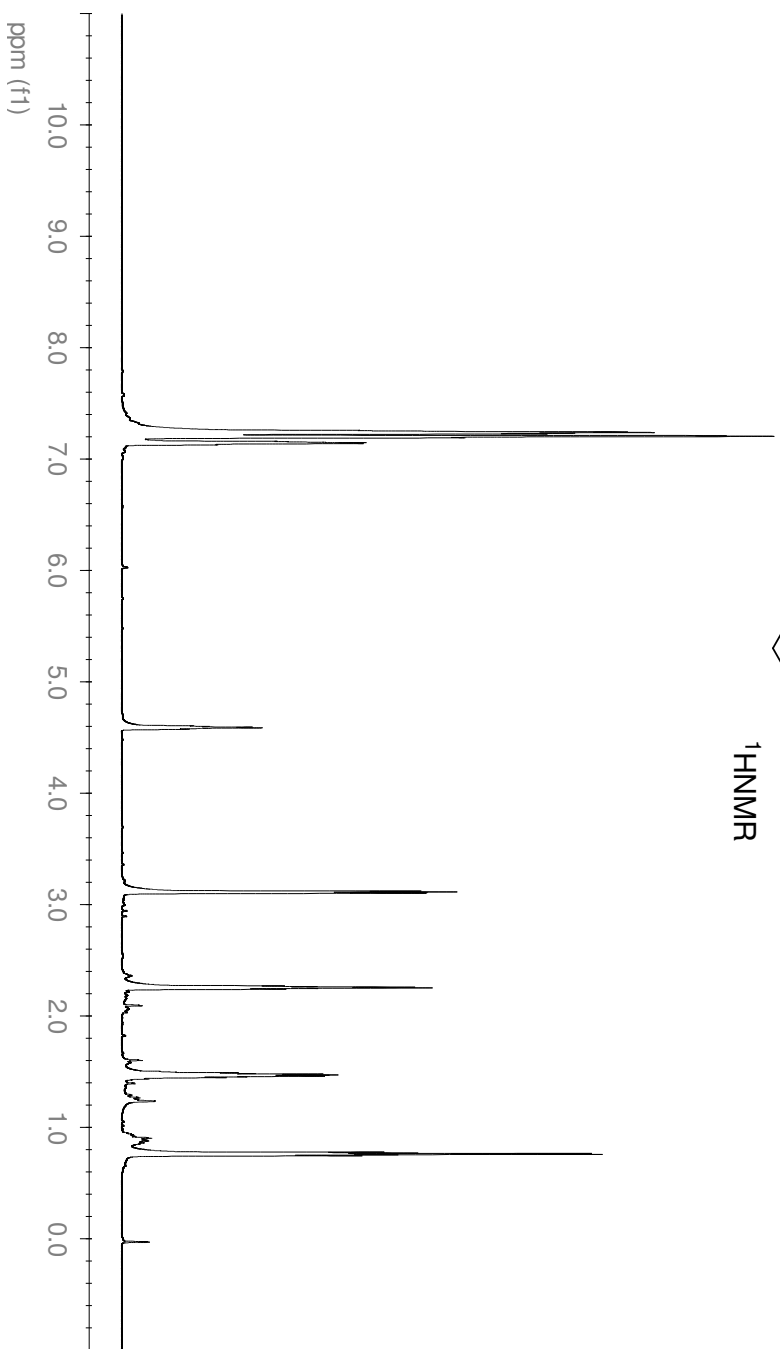

**Spectrum Title:**  
 Dec0409\_lyx-442-1\_1H  
**Frequency (MHz):**  
 (f1) 599.936  
**Acquisition Time (sec):**  
 (f1) 2.0486  
**Spectral Width (ppm):**  
 (f1) 16.027  
**Pulse Program:**  
 s2pul  
**Temperature:**  
 25  
**Number of Scans:**  
 1  
**Acq. Date:**  
 Dec 4 2009

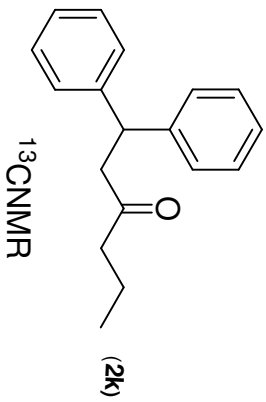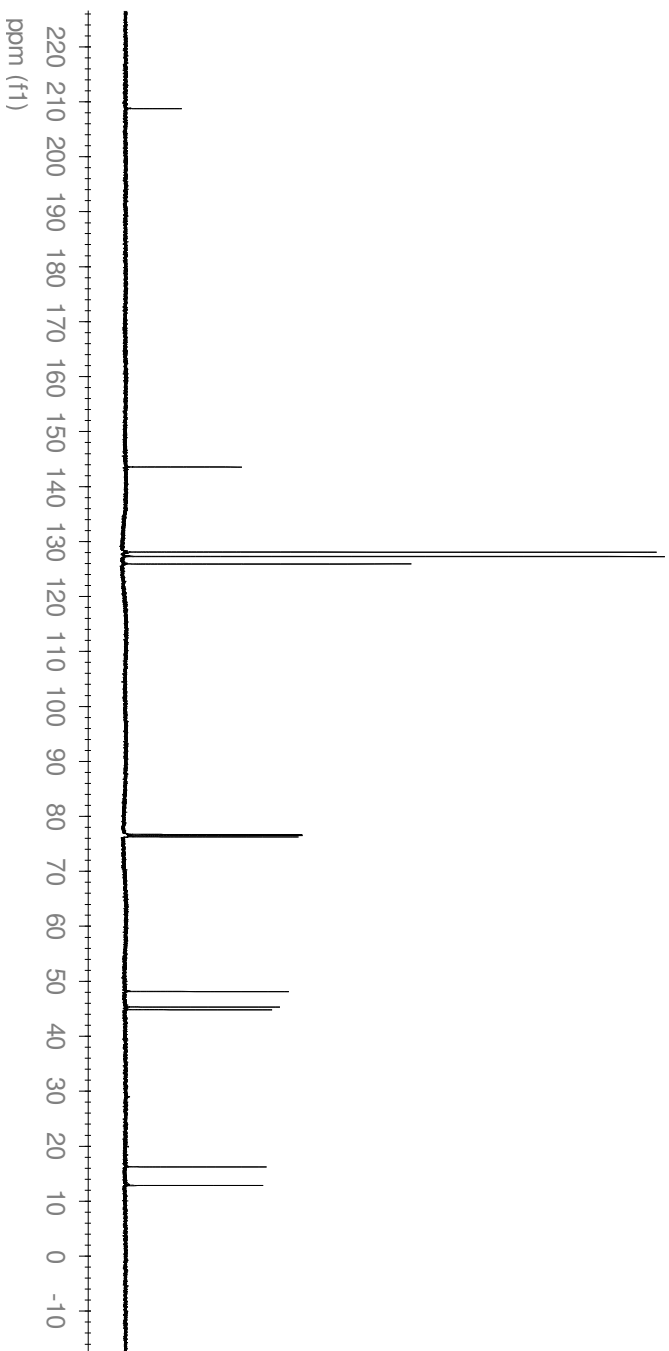

**Spectrum Title:**  
Dec0409 jyx-442-1\_13C

**Frequency (MHz):**

(f1) 150.889

**Acquisition Time (sec):**

(f1) 1.3005

**Spectral Width (ppm):**

(f1) 243.686

**Pulse Program:**

s2pkl

**Temperature:**

25

**Number of Scans:**

512

**Acq. Date:**

Dec 4 2009

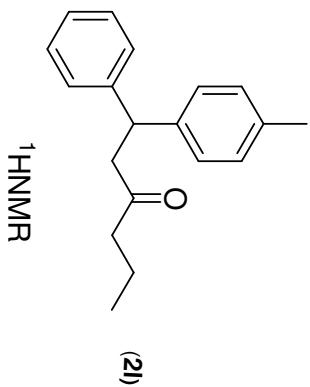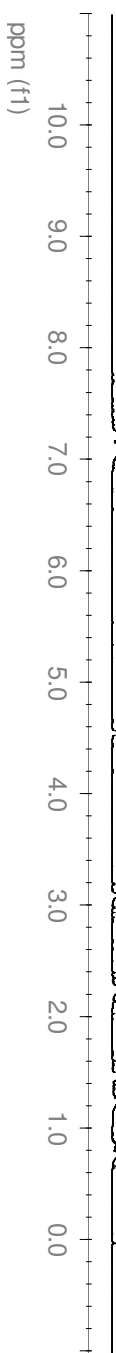

**Spectrum Title:**  
 Dec0309\_lvx-4-45-2\_1H  
**Frequency (MHz):**  
 (f1) 599.936  
**Acquisition Time (sec):**  
 (f1) 2.0486  
**Spectral Width (ppm):**  
 (f1) 16.027  
**Pulse Program:**  
 s2pul  
**Temperature:**  
 25  
**Number of Scans:**  
 4  
**Acq. Date:**  
 Dec 3 2009

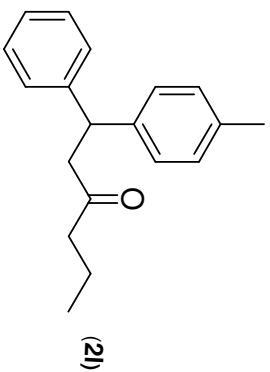

<sup>13</sup>CNMR

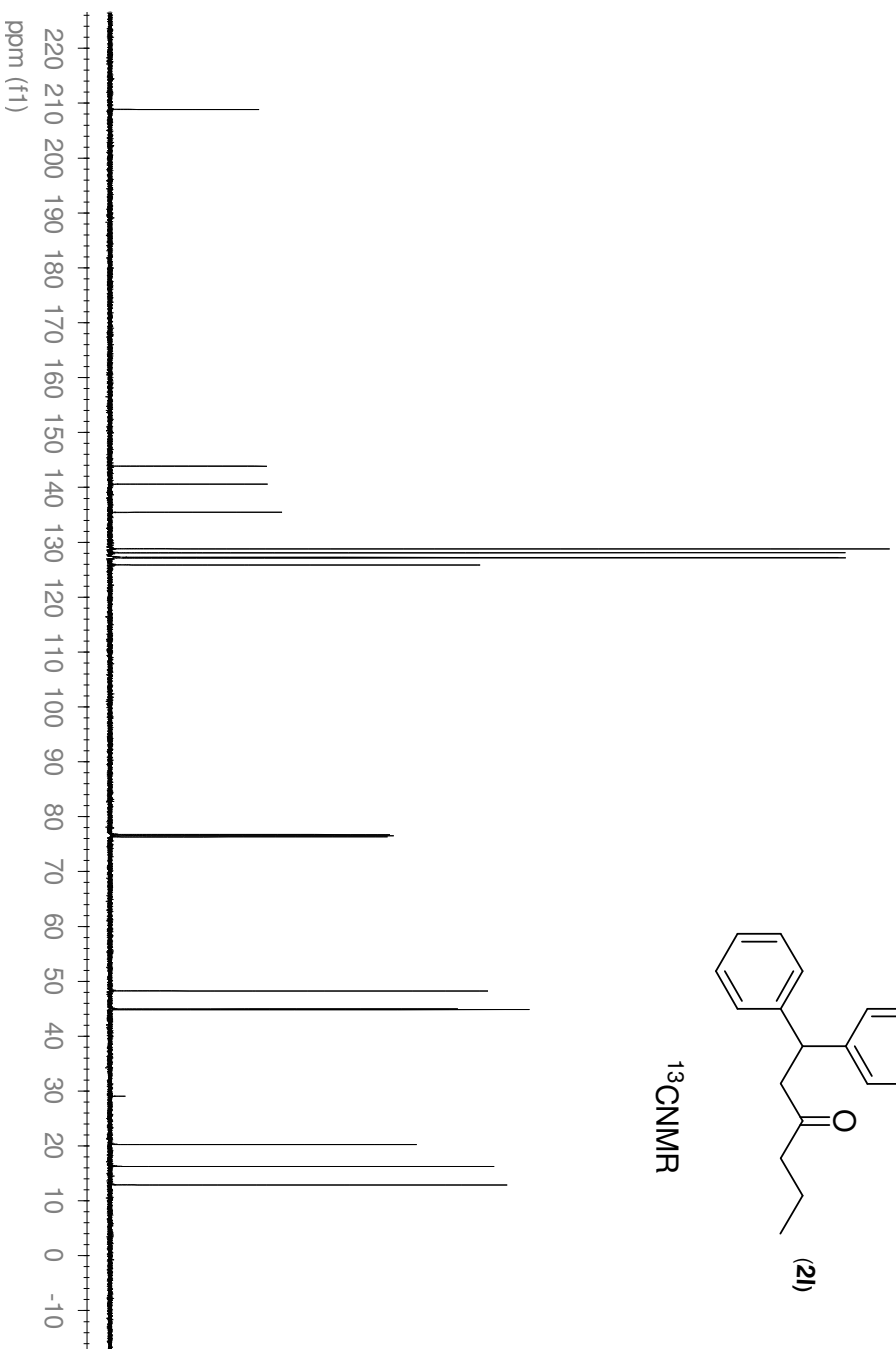

**Spectrum Title:**  
Dec0309\_lyx-4452\_13C

**Frequency (MHz):**

(f1) 130.869

**Acquisition Time (sec):**

(f1) 1.3005

**Spectral Width (ppm):**

(f1) 243.696

**Pulse Program:**

s2pul

**Temperature:**

25

**Number of Scans:**

512

**Acq. Date:**

Dec 3 2009



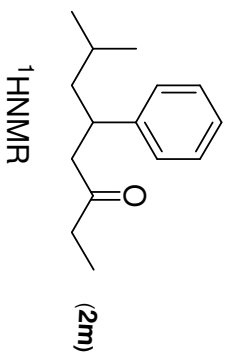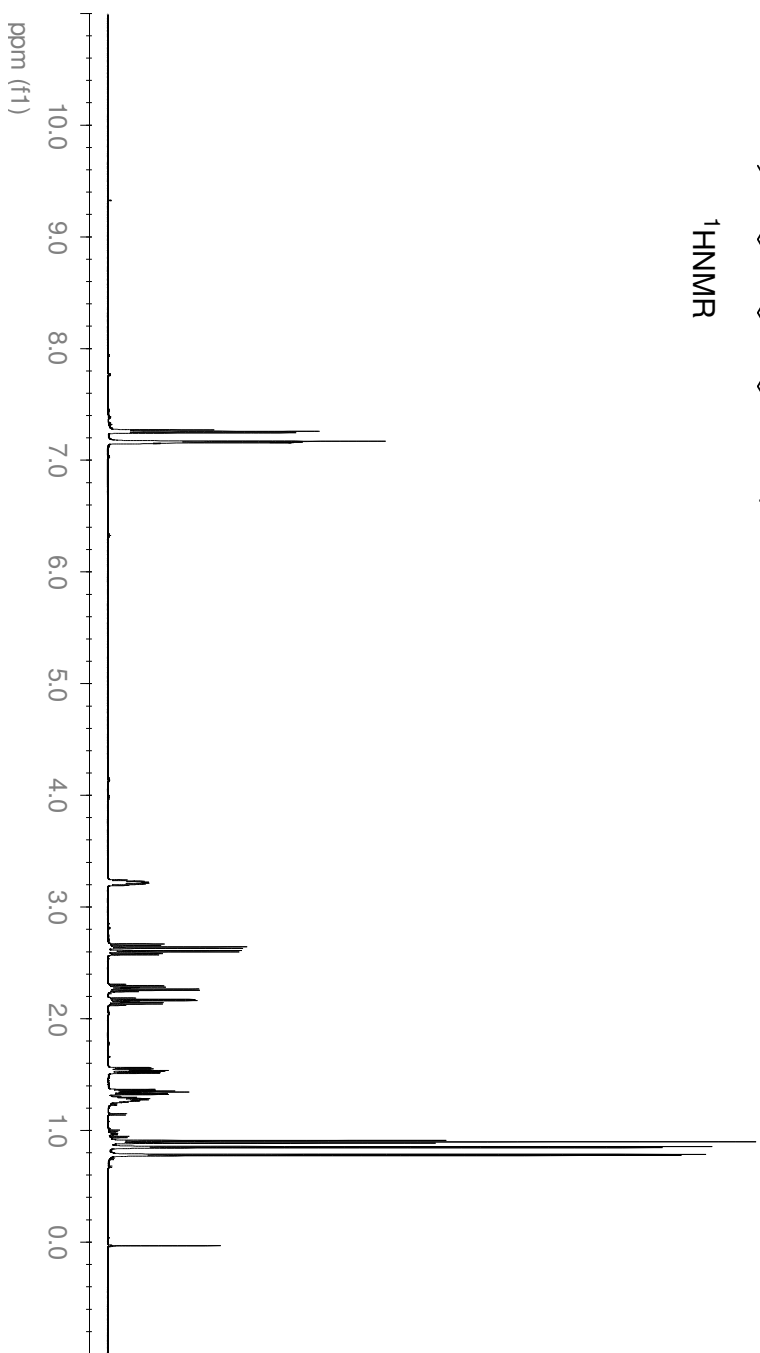

**Spectrum Title:**  
Feb0710\_lyx-4-64-2\_1H

**Frequency (MHz):**  
(f1) 599.936

**Acquisition Time (sec):**  
(f1) 2.0486

**Spectral Width (ppm):**  
(f1) 16.027

**Pulse Program:**  
s2pul

**Temperature:**  
25

**Number of Scans:**  
8

**Acq. Date:**  
Feb 7 2010

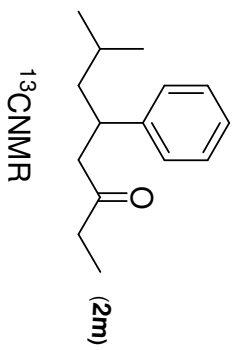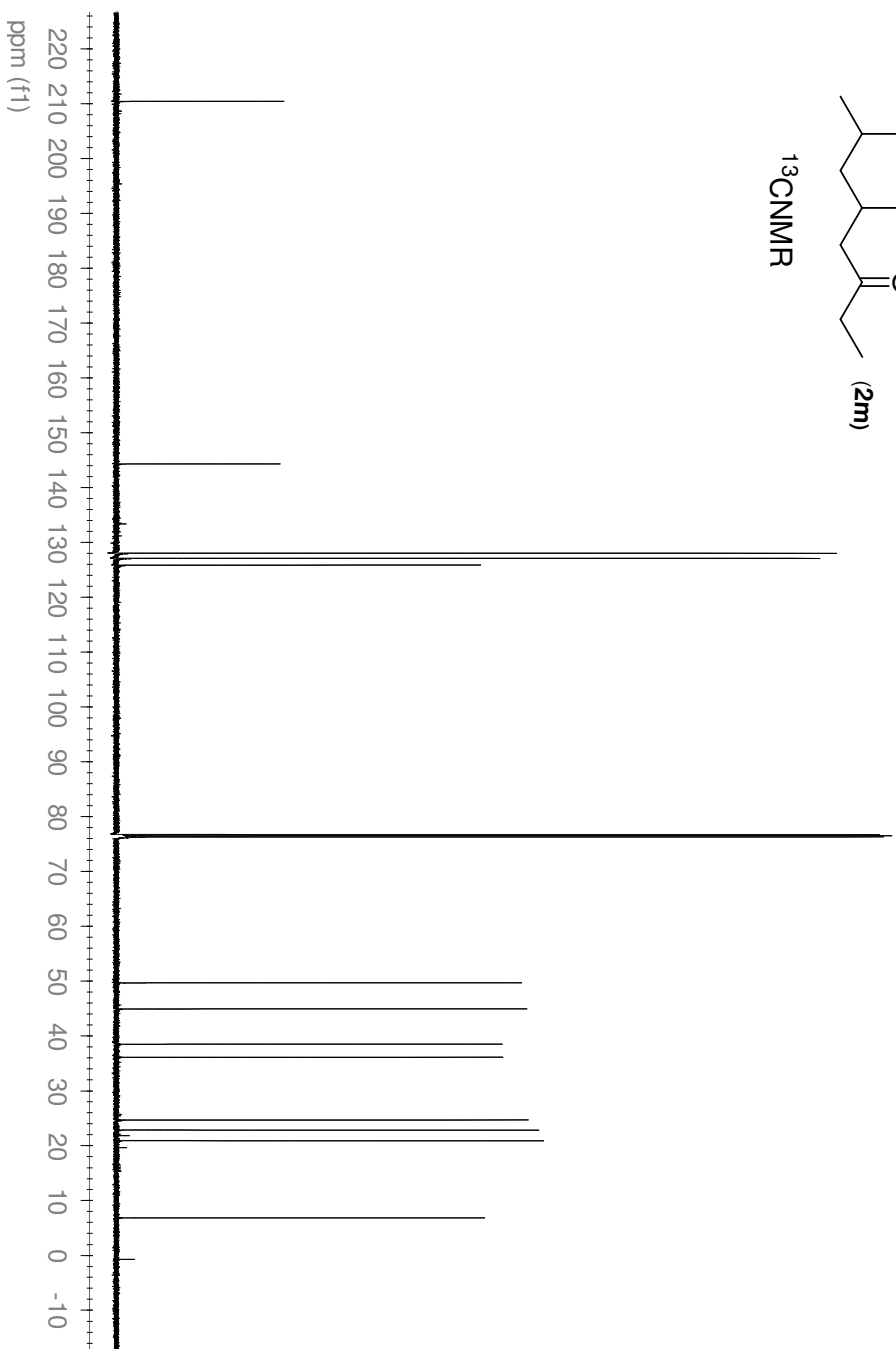

**Spectrum Title:**  
 Feb0710\_lyx-4-64-2\_13C

**Frequency (MHz):**  
 (f1) 150.889

**Acquisition Time (sec):**  
 (f1) 1.3005

**Spectral Width (ppm):**  
 (f1) 243.696

**Pulse Program:**  
 s2pul

**Temperature:**  
 25

**Number of Scans:**  
 1000

**Acq. Date:**  
 Feb 7 2010

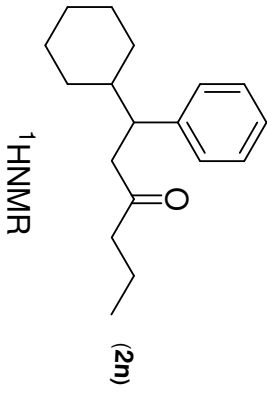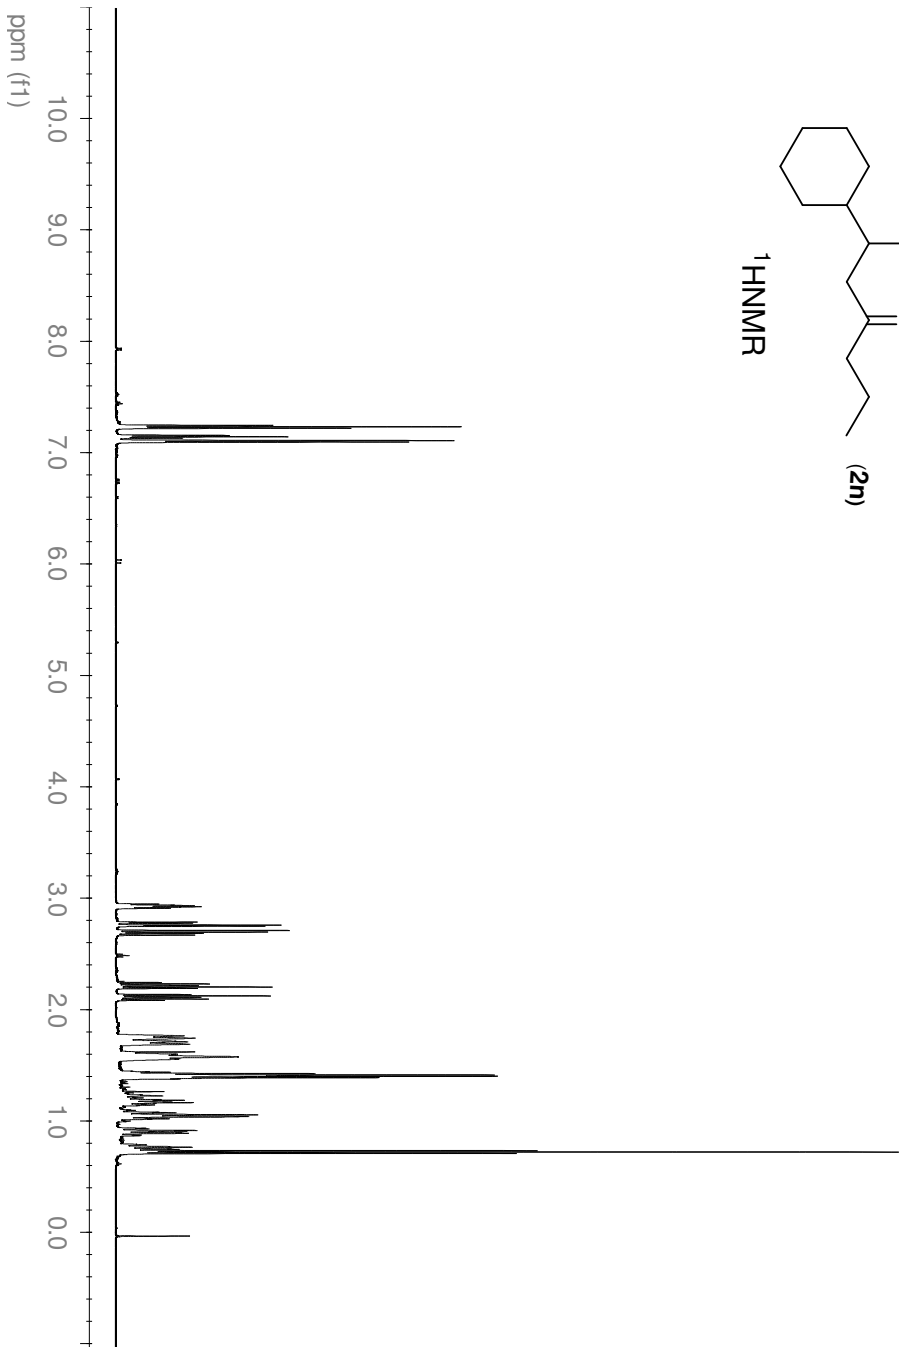

**Spectrum Title:**  
 Dec0909\_ljx-4-46-2\_1H  
**Frequency (MHz):**  
 (f1) 599.396  
**Acquisition Time (sec):**  
 (f1) 2.0486  
**Spectral Width (ppm):**  
 (f1) 16.027  
**Pulse Program:**  
 s2pd  
**Temperature:**  
 25  
**Number of Scans:**  
 4  
**Acq. Date:**  
 Dec 9/2009

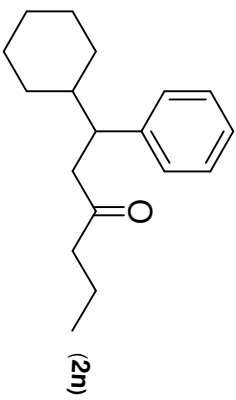

<sup>13</sup>CNMR

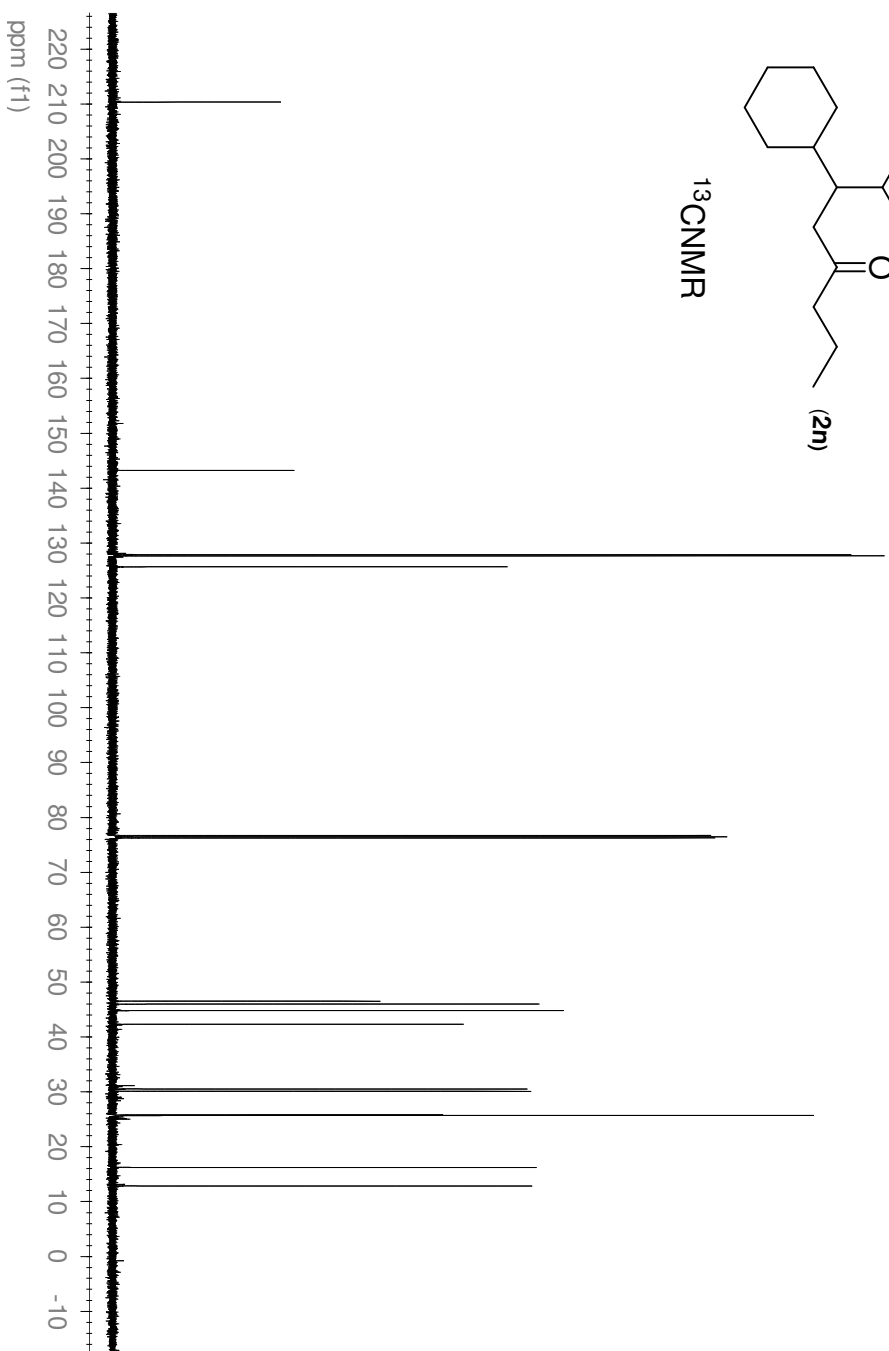

**Spectrum Title:**  
Dec0909\_jyx-4462\_13C

**Frequency (MHz):**

(f1) 150.889

**Acquisition Time (sec):**

(f1) 1.3005

**Spectral Width (ppm):**

(f1) 243.696

**Pulse Program:**

s2pul

**Temperature:**

25

**Number of Scans:**

512

**Acq. Date:**

Dec 9 2009
